# Supplementary material
Source: PubMed Central journal article supplement (PMC8859982)

**Design, Synthesis, and Biological Evaluation of 4-Quinoline Carboxylic Acids as Inhibitors of Dihydroorotate Dehydrogenase**

Joseph T. Madak,<sup>†</sup> Christine R. Cuthbertson,<sup>†</sup> Yoshinari Miyata,<sup>†</sup> Shuzo Tamura,<sup>†</sup> Elyse M. Petrunak,<sup>‡</sup> Jeanne A. Stuckey,<sup>‡</sup> Yanyan Han,<sup>¶</sup> Miao He,<sup>¶</sup> Duxin Sun,<sup>¶</sup> Hollis D. Showalter,<sup>†,\*</sup> Nouri Neamati<sup>†,\*</sup>

**Table of Contents:**

|                                      |      |
|--------------------------------------|------|
| Supplemental Figures and Tables..... | 1-6  |
| Copies of NMR spectra.....           | 7-31 |
| References.....                      | 32   |

## Supplemental Figures

| Analysis Type by Cancer     | Cancer vs. Normal | Cancer vs. Cancer |              | Cancer Subtype Analysis |                        |                            |                            |                         |                         |                            |                    |       |                  | Cancer vs. Baseline (DNA only) | Pathway and Drug |  | Outlier |     |    |     |
|-----------------------------|-------------------|-------------------|--------------|-------------------------|------------------------|----------------------------|----------------------------|-------------------------|-------------------------|----------------------------|--------------------|-------|------------------|--------------------------------|------------------|--|---------|-----|----|-----|
|                             |                   | Cancer Histology  | Multi-cancer | Clinical Outcome        | Metastasis vs. Primary | Molecular Marker Biomarker | Molecular Subtype Mutation | Pathology Subtype Grade | Pathology Subtype Stage | Patient Treatment Response | Recurrence Primary | Other | Drug Sensitivity |                                | Perurbation      |  |         |     |    |     |
| Bladder Cancer              |                   |                   |              |                         |                        |                            |                            |                         |                         |                            |                    |       |                  |                                |                  |  |         | 2   | 2  |     |
| Brain and CNS Cancer        |                   |                   |              |                         |                        |                            |                            |                         |                         |                            |                    |       |                  |                                |                  |  |         | 2   | 7  |     |
| Breast Cancer               |                   |                   |              |                         |                        |                            |                            |                         |                         |                            |                    |       |                  |                                |                  |  |         | 6   | 8  |     |
| Cervical Cancer             |                   |                   |              |                         |                        |                            |                            |                         |                         |                            |                    |       |                  |                                |                  |  |         |     |    |     |
| Colorectal Cancer           | 1                 |                   |              |                         |                        |                            |                            |                         |                         |                            |                    |       |                  |                                |                  |  |         | 5   | 6  |     |
| Esophageal Cancer           |                   |                   |              |                         |                        |                            |                            |                         |                         |                            |                    |       |                  |                                |                  |  |         |     | 1  |     |
| Gastric Cancer              |                   |                   |              |                         |                        |                            |                            |                         |                         |                            |                    |       |                  |                                |                  |  |         | 4   | 2  |     |
| Head and Neck Cancer        |                   |                   |              |                         |                        |                            |                            |                         |                         |                            |                    |       |                  |                                |                  |  |         | 2   | 4  |     |
| Kidney Cancer               | 1                 | 1                 | 1            |                         |                        |                            |                            |                         |                         |                            |                    |       |                  |                                |                  |  | 1       | 3   | 4  |     |
| Leukemia                    |                   |                   |              |                         |                        |                            |                            |                         |                         |                            |                    |       |                  |                                |                  |  |         | 5   | 14 |     |
| Liver Cancer                |                   | 6                 | 1            | 1                       |                        |                            |                            |                         |                         |                            |                    |       |                  |                                |                  |  |         | 4   | 6  |     |
| Lung Cancer                 |                   |                   |              |                         |                        |                            |                            |                         |                         |                            |                    |       |                  |                                |                  |  |         | 2   | 4  |     |
| Lymphoma                    | 1                 |                   |              |                         |                        |                            |                            |                         |                         |                            |                    |       |                  |                                |                  |  |         | 4   | 7  |     |
| Melanoma                    |                   |                   |              |                         |                        |                            |                            |                         |                         |                            |                    |       |                  |                                |                  |  |         | 4   | 5  |     |
| Myeloma                     |                   |                   |              |                         |                        |                            |                            |                         |                         |                            |                    |       |                  |                                |                  |  |         |     | 9  |     |
| Other Cancer                |                   |                   |              |                         |                        |                            |                            |                         |                         |                            |                    |       |                  |                                |                  |  |         | 4   | 10 |     |
| Ovarian Cancer              |                   |                   |              |                         |                        |                            |                            |                         |                         |                            |                    |       |                  |                                |                  |  |         | 3   | 1  |     |
| Pancreatic Cancer           |                   |                   |              |                         |                        |                            |                            |                         |                         |                            |                    |       |                  |                                |                  |  |         | 2   | 1  |     |
| Prostate Cancer             |                   |                   |              |                         |                        |                            |                            |                         |                         |                            |                    |       |                  |                                |                  |  |         | 1   | 14 |     |
| Sarcoma                     |                   |                   |              |                         |                        |                            |                            |                         |                         |                            |                    |       |                  |                                |                  |  |         | 5   | 8  |     |
| Significant Unique Analyses | 3                 | 6                 | 2            | 2                       |                        |                            |                            |                         |                         |                            |                    |       |                  |                                |                  |  |         | 1   | 51 | 101 |
| Total Unique Analyses       | 464               | 743               | 255          | 622                     | 50                     | 254                        | 634                        | 211                     | 462                     | 100                        | 27                 | 118   | 243              | 942                            | 291              |  |         | 964 |    |     |

**Supplemental Figure 1: Overexpression of DHODH in various cancers.** This data was generated using the OncoPrint database.<sup>1-3</sup>

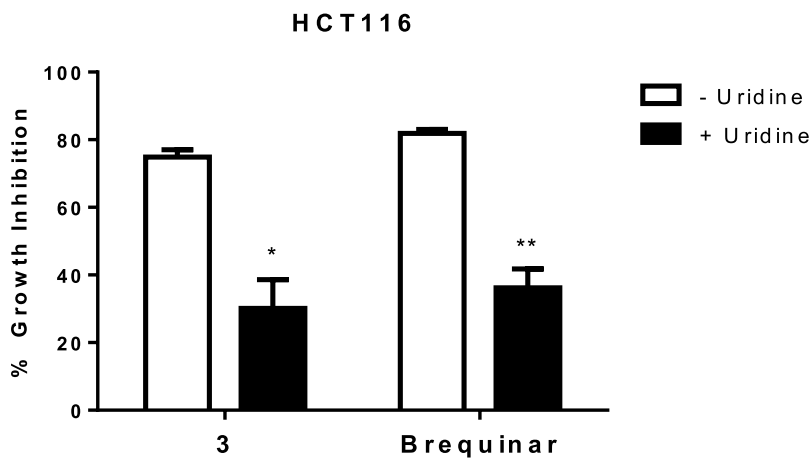

**Supplemental Figure 2: Uridine supplementation rescues cell growth inhibition induced by lead compound 3.** Compound 3 and brequinar were evaluated at twice their IC<sub>50</sub> values. Antiproliferative effects were determined in media ± 5 μM uridine. Data are represented as the mean and standard deviation from three independent experiments. \* p < 0.001, \*\* p < 0.0005

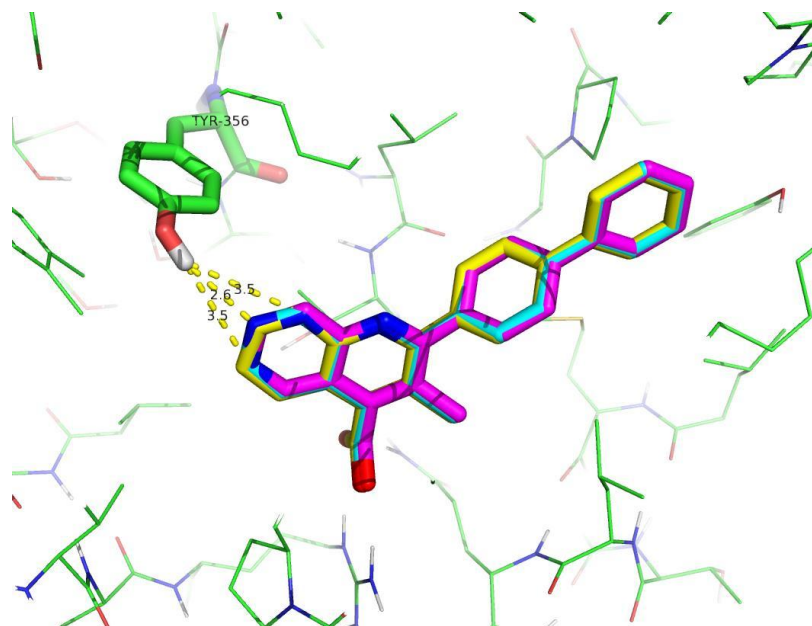

**Supplemental Figure 3: 1,7-naphthyridines show optimal positioning to form a hydrogen bond with Y356.** DHODH (1D3G, green), **45** (yellow), **46** (cyan), and **47** (magenta).

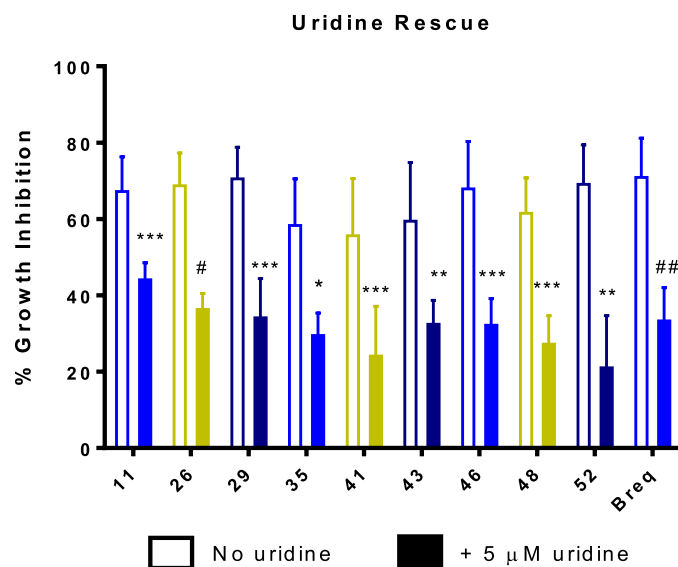

**Supplemental Figure 4: Uridine supplementation rescues cell growth inhibition induced by select optimized analogs.** Compounds were evaluated at twice their  $IC_{50}$  values. Antiproliferative effects were determined in media  $\pm$  5  $\mu$ M uridine. Data are represented as the mean and standard deviation from at least three independent experiments. \*  $p < 0.05$ , \*\*  $p < 0.01$ , \*\*\*  $p < 0.005$ , #  $p = 0.0005$ , ##  $p \leq 0.0001$ .

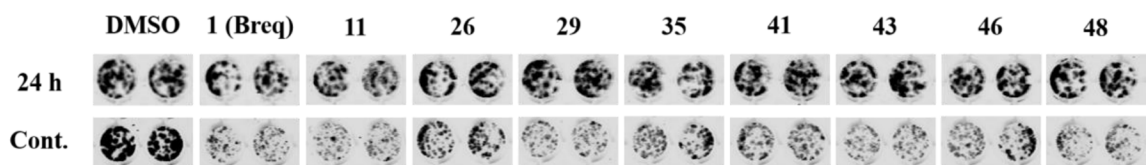

**Supplemental Figure 5: DHODH inhibitors are cytostatic.** HCT-116 cells were treated with 10  $\mu$ M of the indicated analogs for either 24 hr or continuously for a period of seven days.

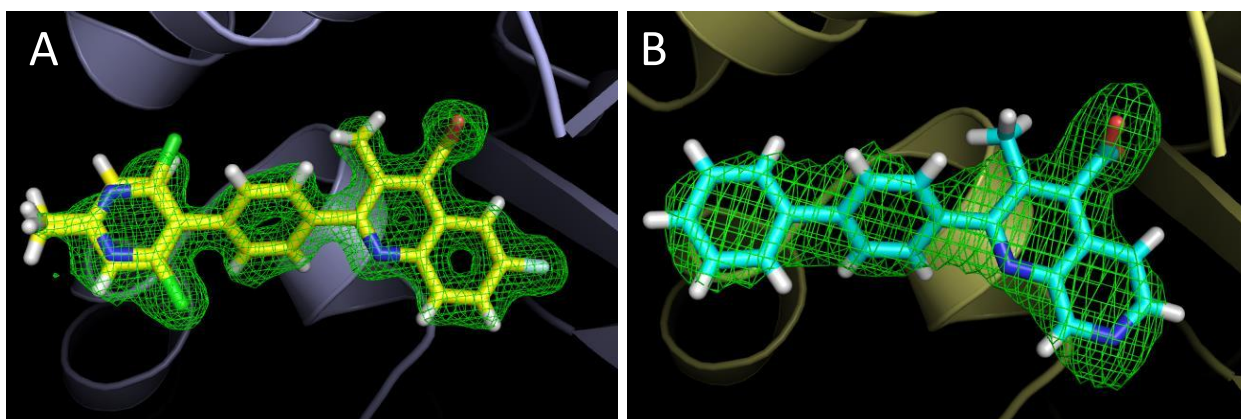

**Supplemental Figure 6:** Difference electron density (green mesh) corresponding to **43** (yellow, left) and **46** (cyan, right) contoured to  $3\sigma$ .

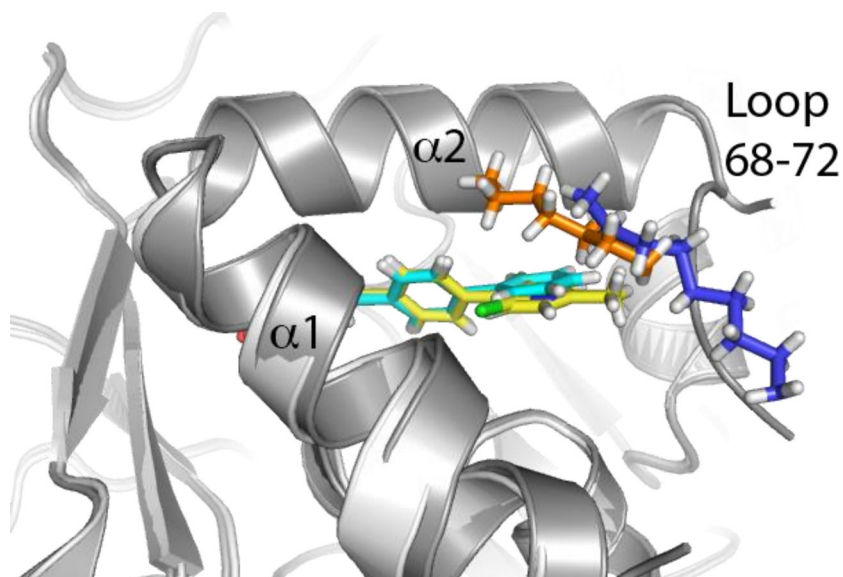

**Supplemental Figure 7:** Overlay of DHODH structure with inhibitors **43** (polypeptide in light gray, inhibitor in yellow, Zwittergent aliphatic chain shown in orange) compared DHODH bound to **46** (polypeptide in dark gray, inhibitor in cyan, Zwittergent aliphatic chain shown in blue) showing differences in the loop near the binding site corresponding to residues 68-72 where peptide was able to be modeled. Also shown are modeled aliphatic chains associated with detergent packed against the 68-72 loop and inhibitors.

**Supplemental Table 1: Molecular docking binding energies**

| Compound #            | Affinity (kcal/mol) <sup>a</sup> | Predicted K <sub>i</sub> |
|-----------------------|----------------------------------|--------------------------|
| 1D3G brequinar analog | -13.0                            | 3.91E-11                 |
| 13                    | -12.1                            | 2.05E-10                 |
| 14                    | -12.2                            | 1.71E-10                 |
| 16                    | -12.2                            | 1.71E-10                 |
| 22                    | -12.9                            | 4.7E-11                  |
| 26                    | -12.6                            | 8.17E-11                 |
| 28                    | -12.6                            | 8.17E-11                 |
| 32                    | -12.6                            | 8.17E-11                 |
| 45                    | -12.4                            | 1.18E-10                 |
| 46                    | -12.3                            | 1.42E-10                 |
| 47                    | -12.3                            | 1.42E-10                 |

<sup>a</sup>All binding energies shown are for the highest-ranking pose.

**Supplemental Table 2: Crystallography Data Collection and Refinement Statistics**

| <b>Data Collection</b>                    | <b>DHODH:43</b>                                                                                    | <b>DHODH:46</b>                                                             |
|-------------------------------------------|----------------------------------------------------------------------------------------------------|-----------------------------------------------------------------------------|
| PDBID                                     | 6CJF                                                                                               | 6CJG                                                                        |
| Space Group                               | P1                                                                                                 | P3 <sub>2</sub> 21                                                          |
| Unit Cell (Å)                             | a = 50.753 b= 51.528 c = 65.088<br>$\alpha = 89.15^\circ \beta = 81.61^\circ \gamma = 76.44^\circ$ | a = b =90.098 c = 123.176<br>$\alpha = \beta = 90^\circ \gamma = 120^\circ$ |
| Wavelength (Å)                            | 0.9786                                                                                             | 0.9786                                                                      |
| Resolution (Å) <sup>1</sup>               | 1.63 (1.63-1.66)                                                                                   | 2.85 (2.85-2.90)                                                            |
| Rsym <sup>2</sup>                         | 0.056 (0.429)                                                                                      | 0.223 (1.075)                                                               |
| $\langle I/\sigma I \rangle$ <sup>3</sup> | 10 (2)                                                                                             | 10 (2)                                                                      |
| Completeness (%) <sup>4</sup>             | 97.2 (95.2)                                                                                        | 100 (100)                                                                   |
| Redundancy                                | 4.0 (4.0)                                                                                          | 16.2 (15.2)                                                                 |
| <b>Refinement</b>                         |                                                                                                    |                                                                             |
| Resolution (Å)                            | 1.63                                                                                               | 2.85                                                                        |
| R-Factor <sup>5</sup>                     | 0.163                                                                                              | 0.170                                                                       |
| Rfree <sup>6</sup>                        | 0.188                                                                                              | 0.206                                                                       |
| Protein atoms                             | 5303                                                                                               | 2654                                                                        |
| Compounds                                 | 2                                                                                                  | 1                                                                           |
| Water Molecules                           | 365                                                                                                | 67                                                                          |
| Unique Reflections                        | 75537                                                                                              | 13950                                                                       |
| R.m.s.d. <sup>7</sup>                     |                                                                                                    |                                                                             |
| Bonds                                     | 0.006                                                                                              | 0.008                                                                       |
| Angles                                    | 0.865                                                                                              | 0.991                                                                       |
| MolProbity Score <sup>8</sup>             | 1.44                                                                                               | 1.54                                                                        |
| Clash Score <sup>8</sup>                  | 3.93                                                                                               | 4.22                                                                        |
| RSR <sup>9</sup>                          | 0.10/0.09                                                                                          | 0.16                                                                        |
| RSCC <sup>9</sup>                         | 0.93/0.93                                                                                          | 0.97                                                                        |

<sup>1</sup>Statistics for highest resolution bin of reflections in parentheses.

<sup>2</sup> $R_{\text{sym}} = \sum_h \sum_j |I_{hj} - \langle I_h \rangle| / \sum_h \sum_j I_{hj}$ , where  $I_{hj}$  is the intensity of observation j of reflection h and  $\langle I_h \rangle$  is the mean intensity for multiply recorded reflections.

<sup>3</sup>Intensity signal-to-noise ratio.

<sup>4</sup>Completeness of the unique diffraction data.

<sup>5</sup>R-factor =  $\sum_h | |F_o| - |F_c| | / \sum_h |F_o|$ , where  $F_o$  and  $F_c$  are the observed and calculated structure factor amplitudes for reflection h.

<sup>6</sup> $R_{\text{free}}$  is calculated against a 5% random sampling of the reflections that were removed before structure refinement.

<sup>7</sup>Root mean square deviation of bond lengths and bond angles.

<sup>8</sup>Chen et al. (2010) MolProbity: all-atom structure validation for macromolecular crystallography. Acta Crystallographica D66:12-21.

<sup>9</sup>wwPDB Validation Server.

## Copies of NMR Spectra

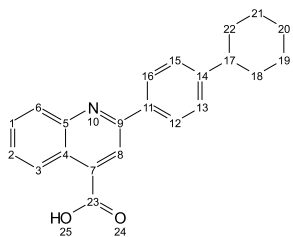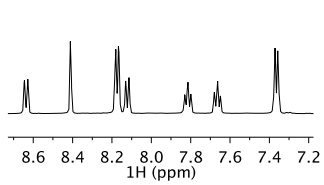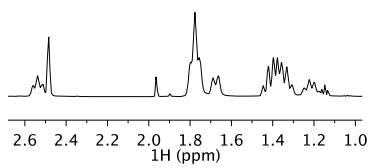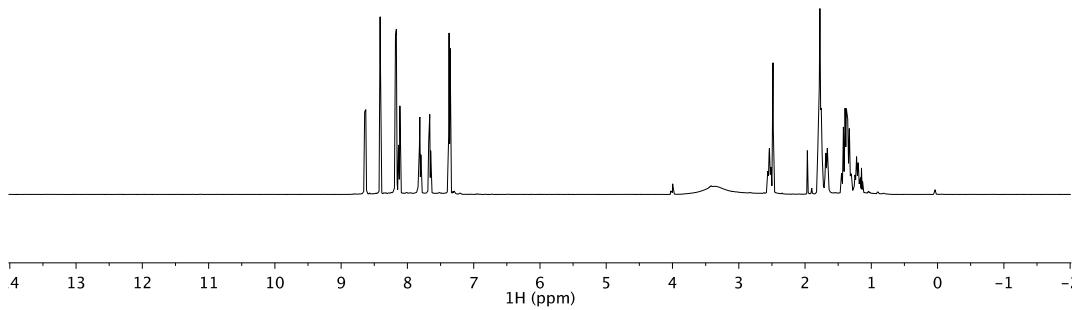

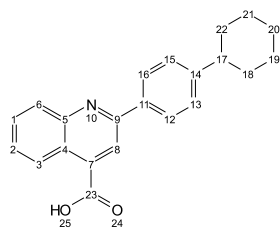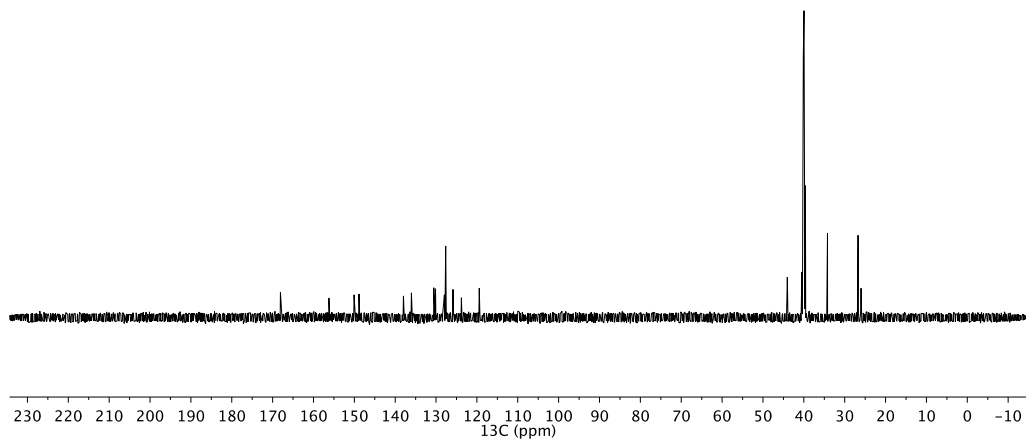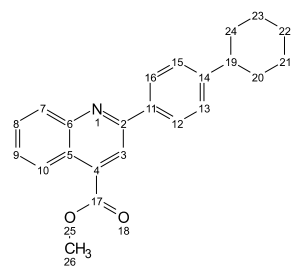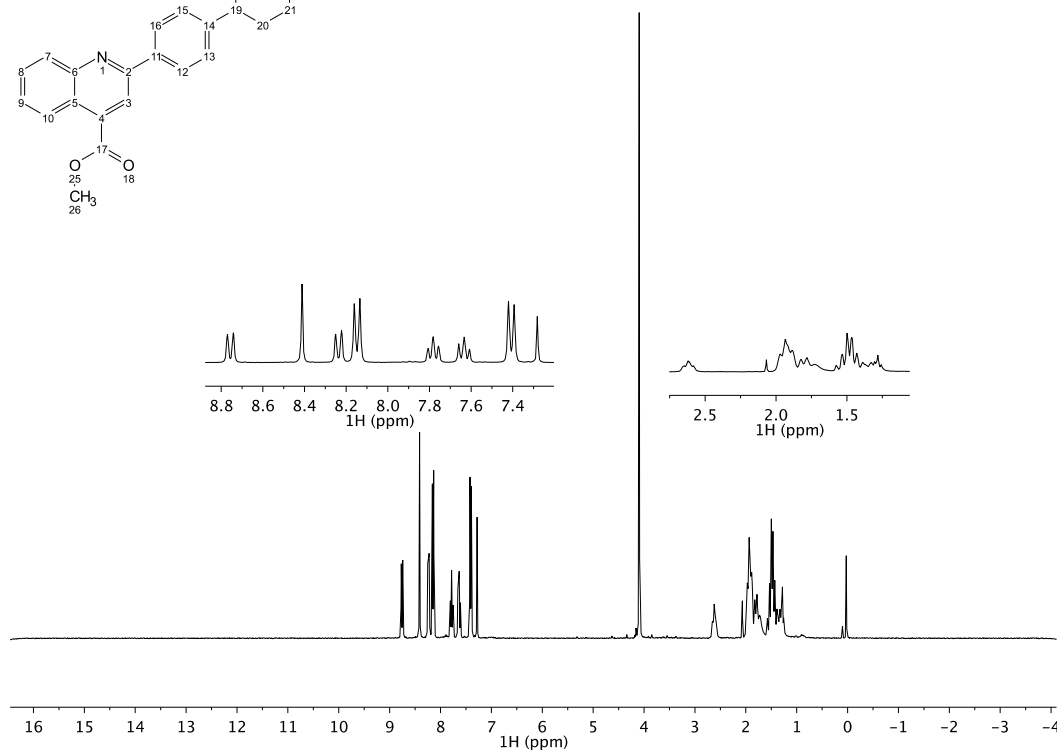



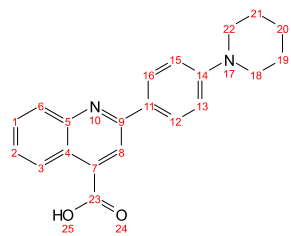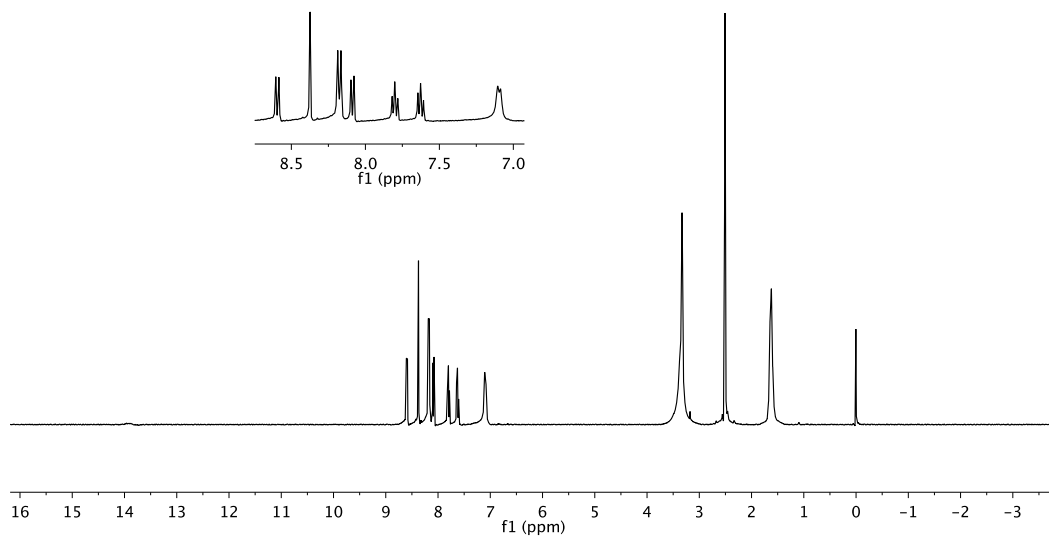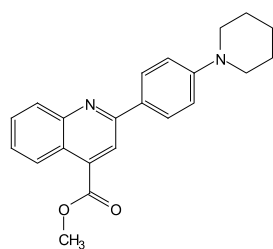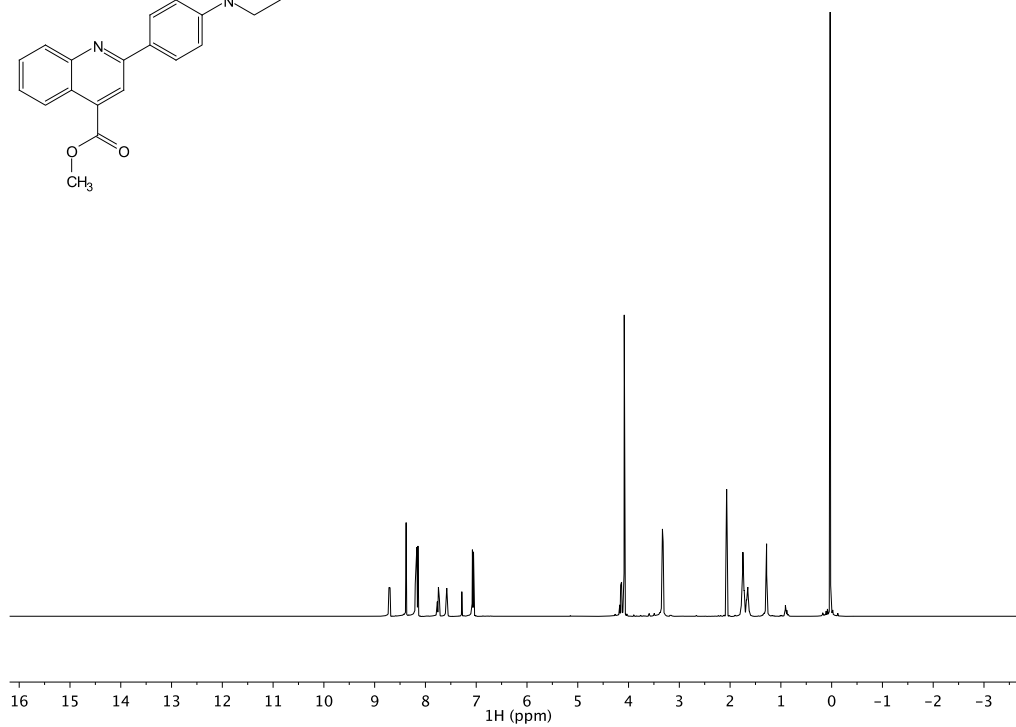

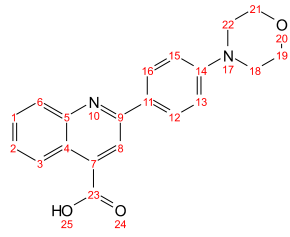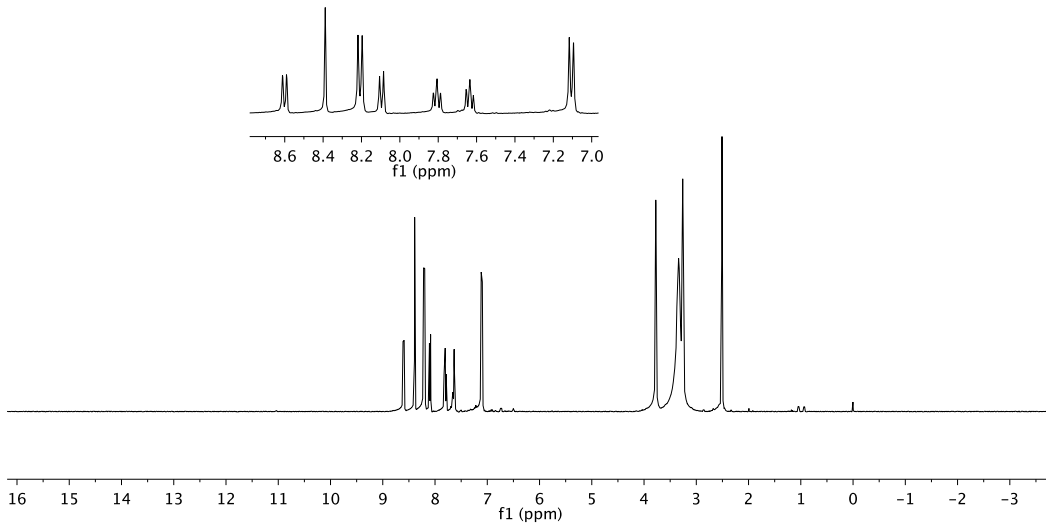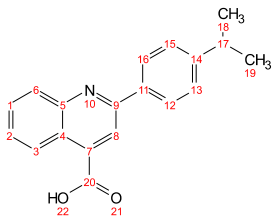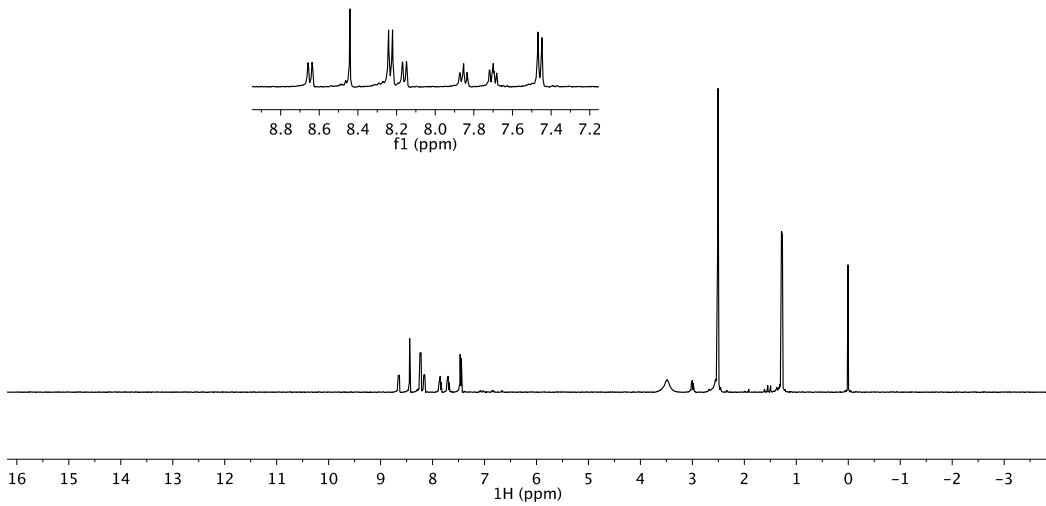

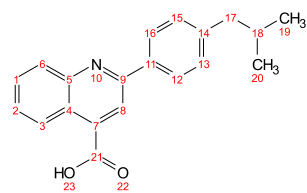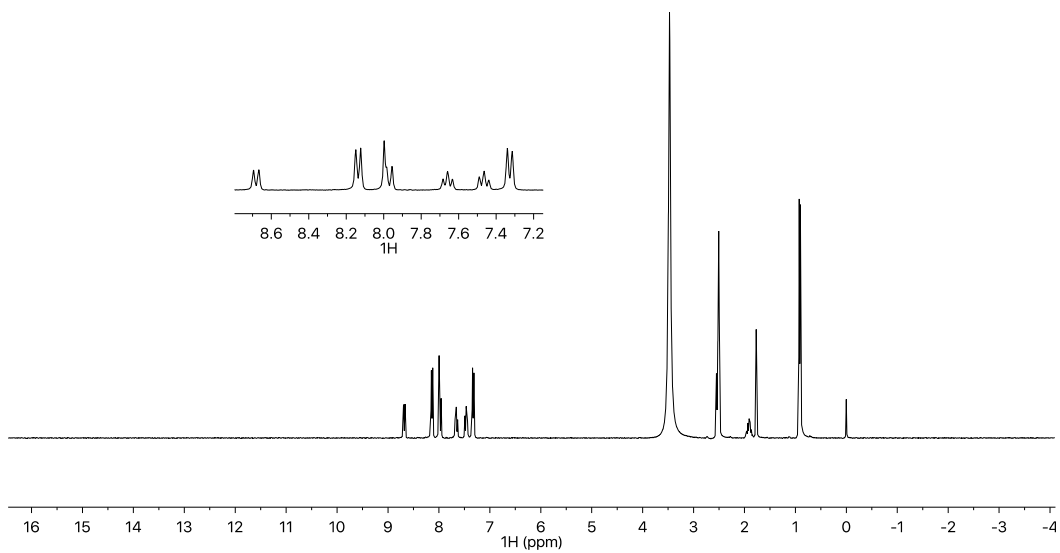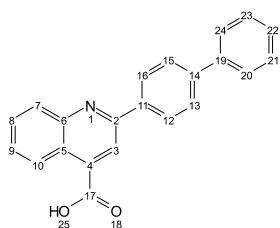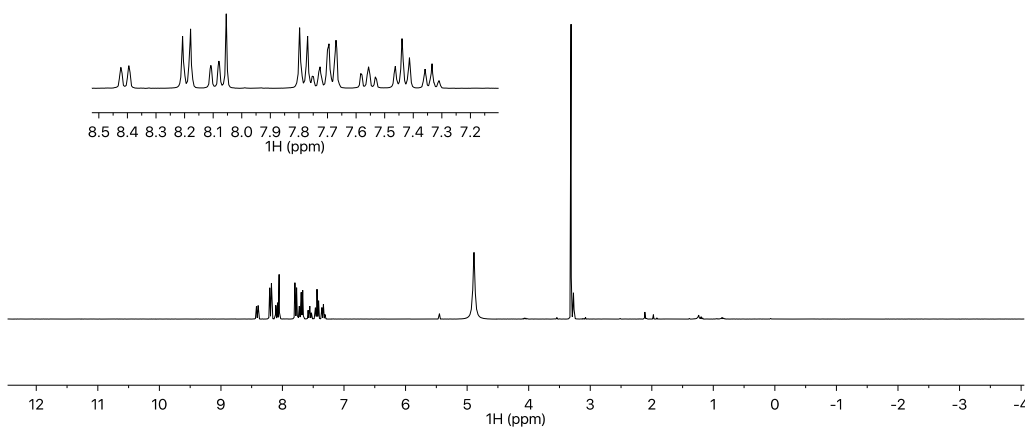

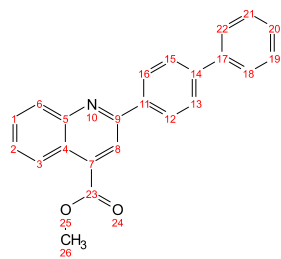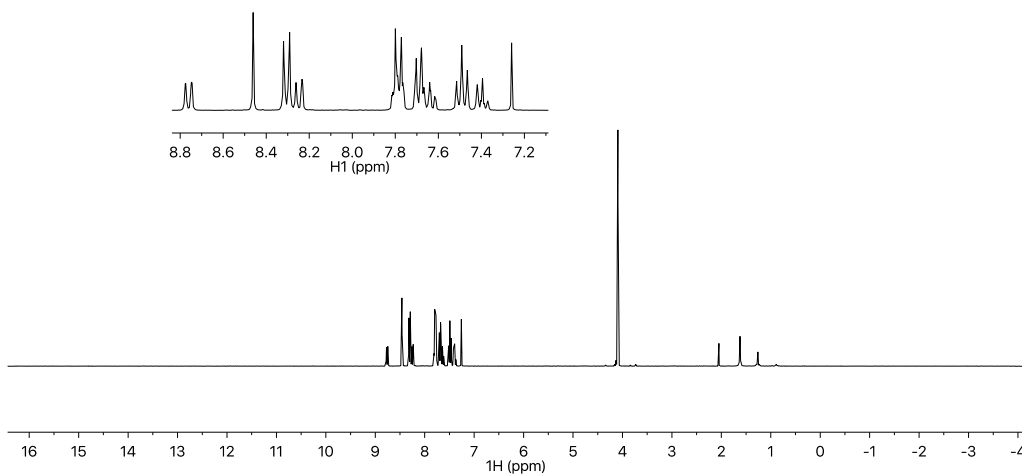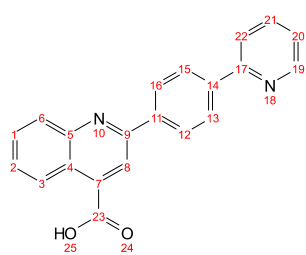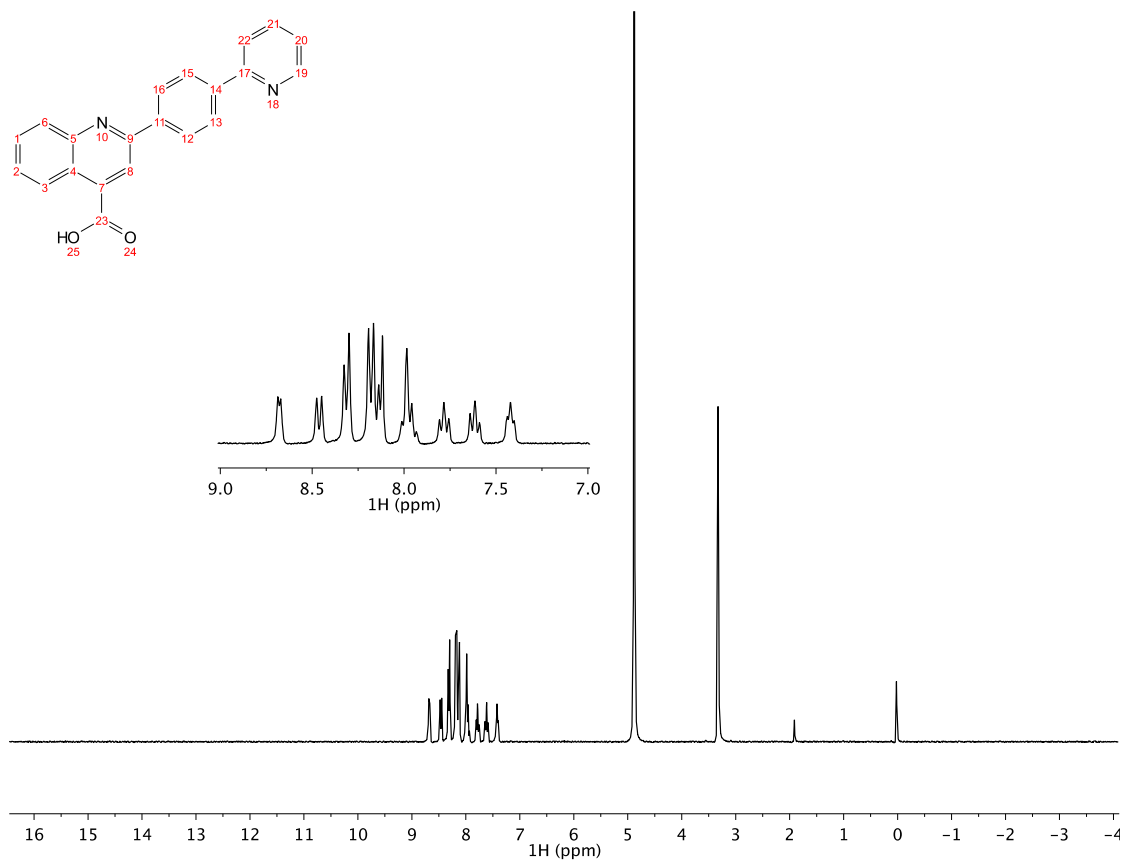

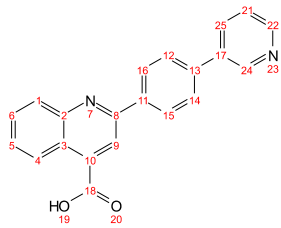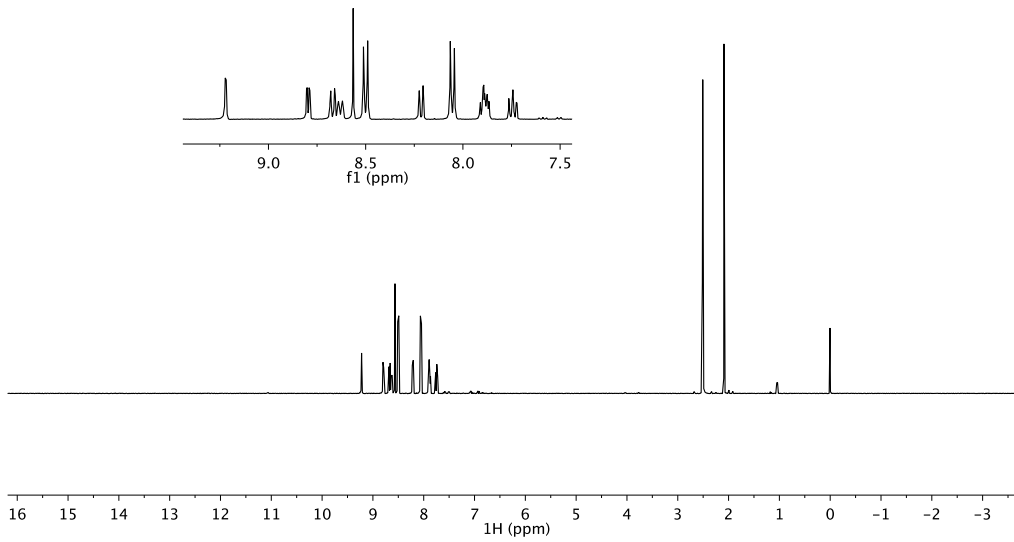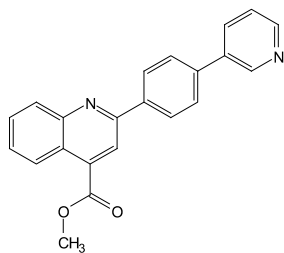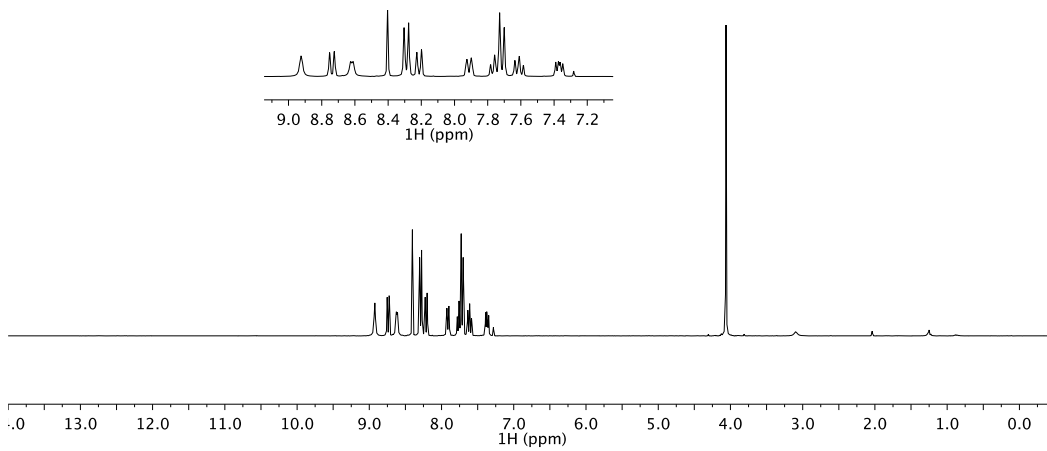

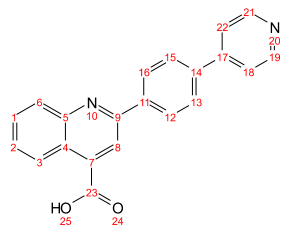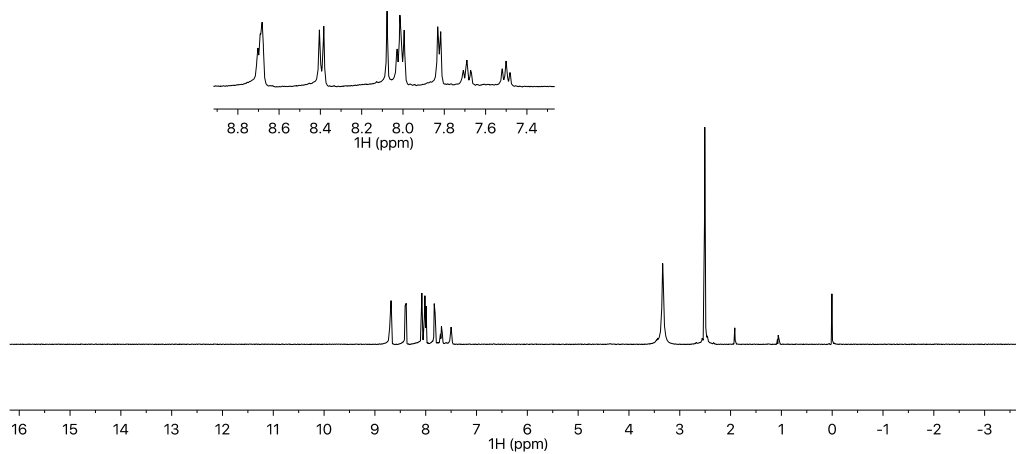

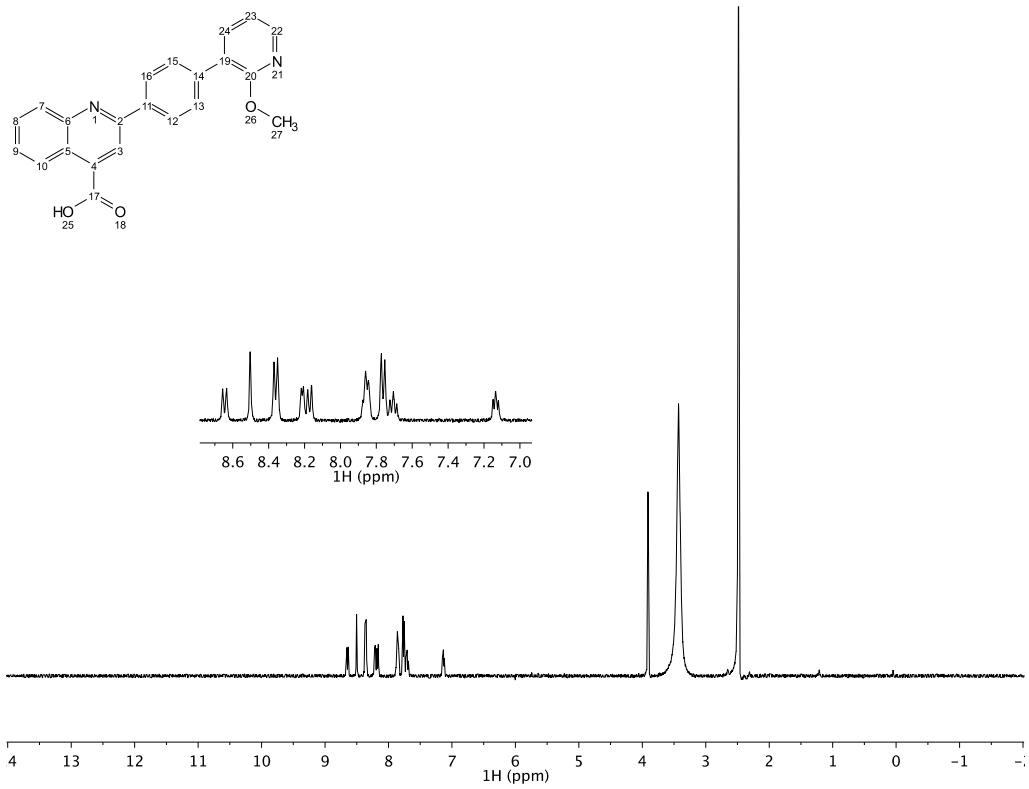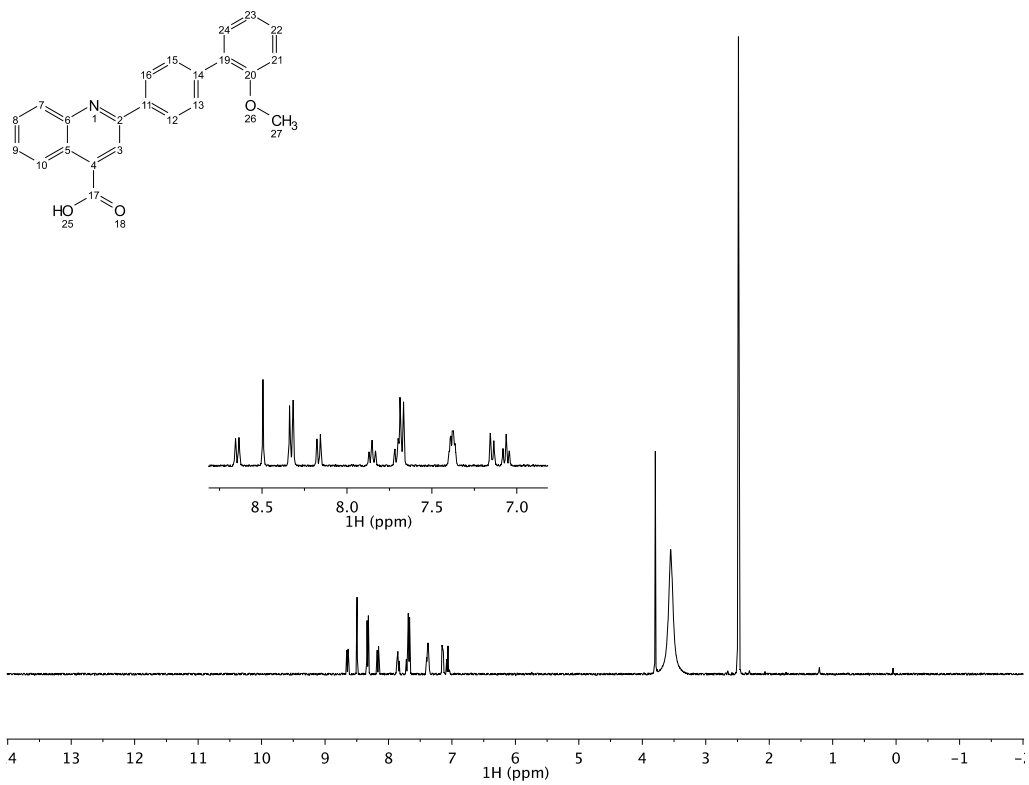

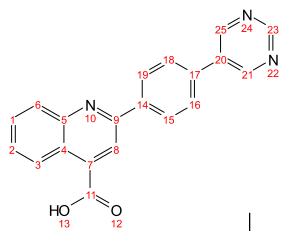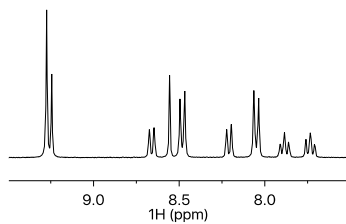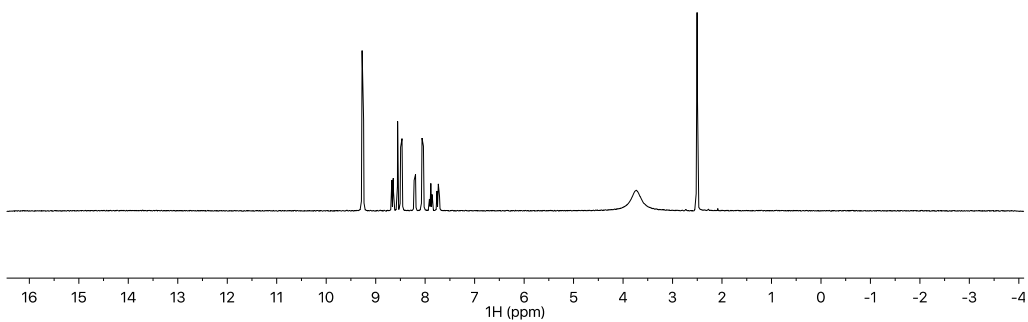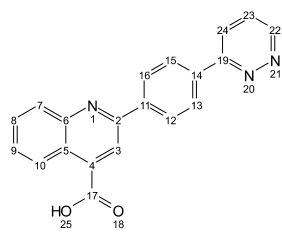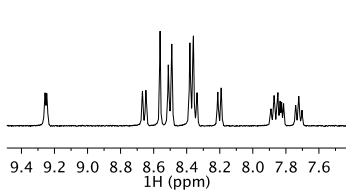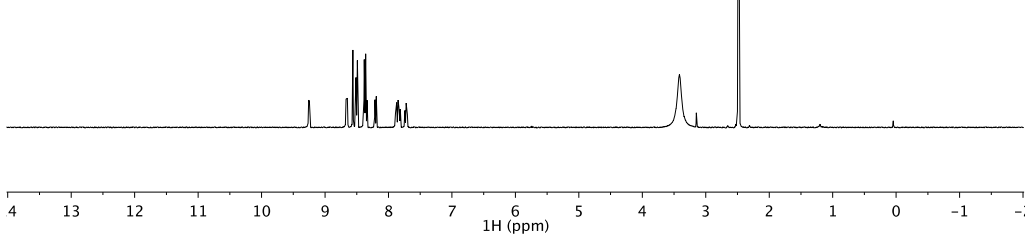



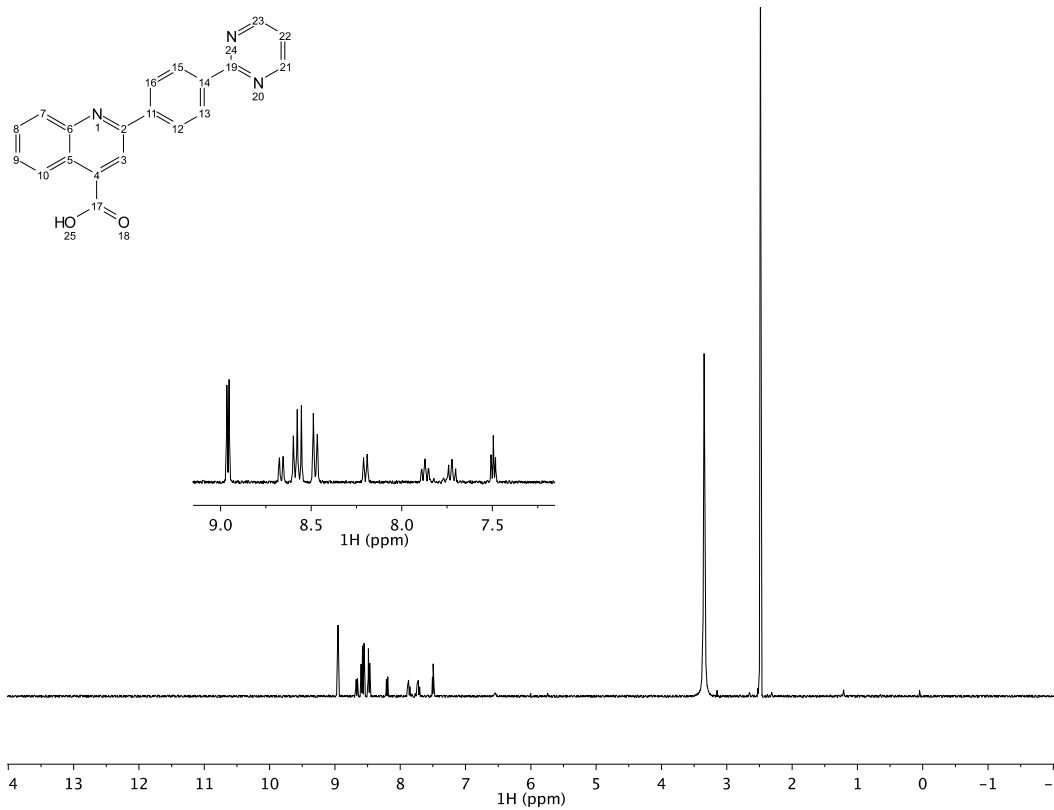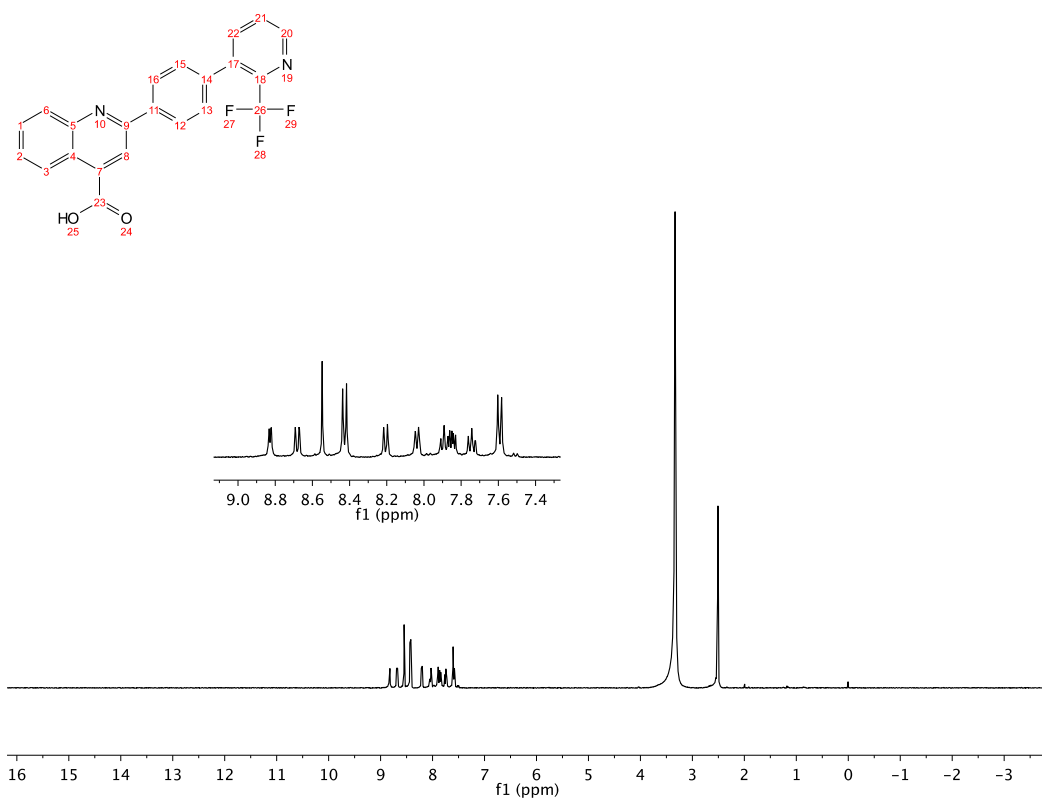

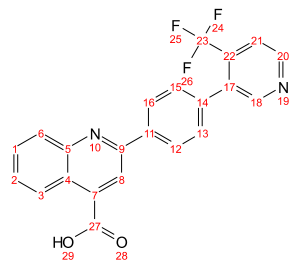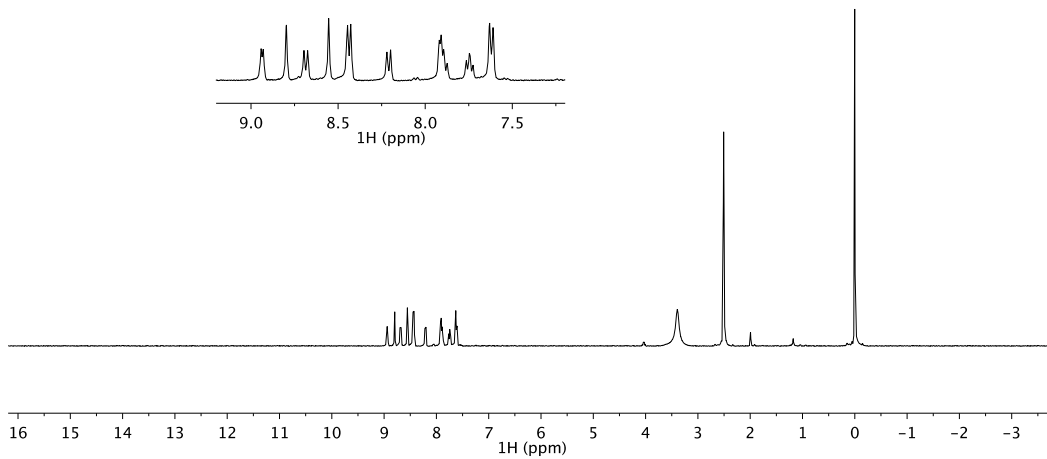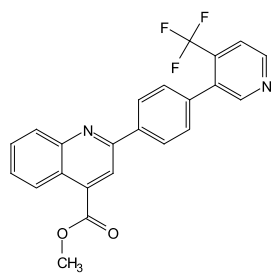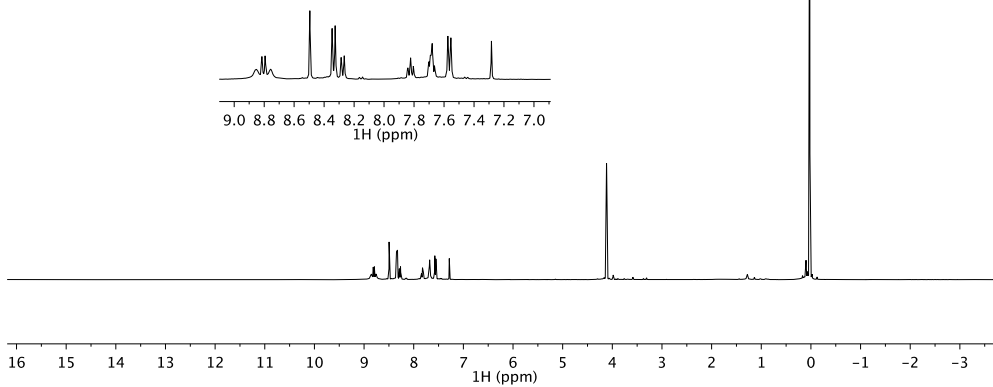

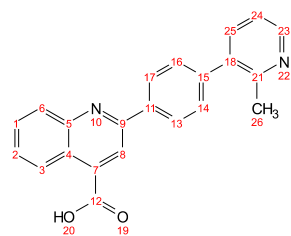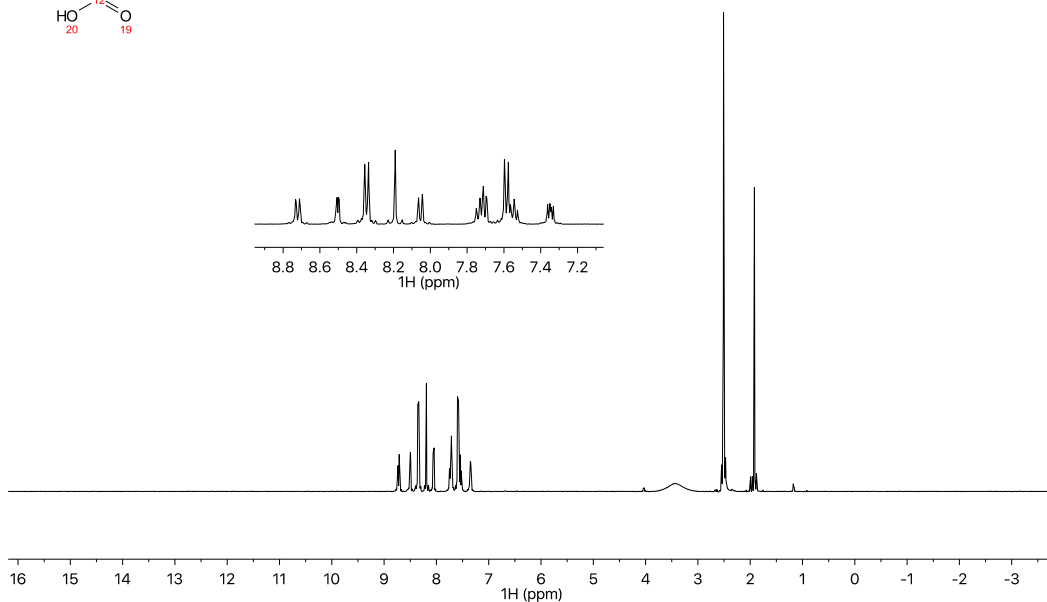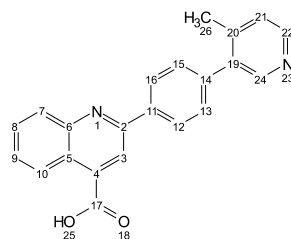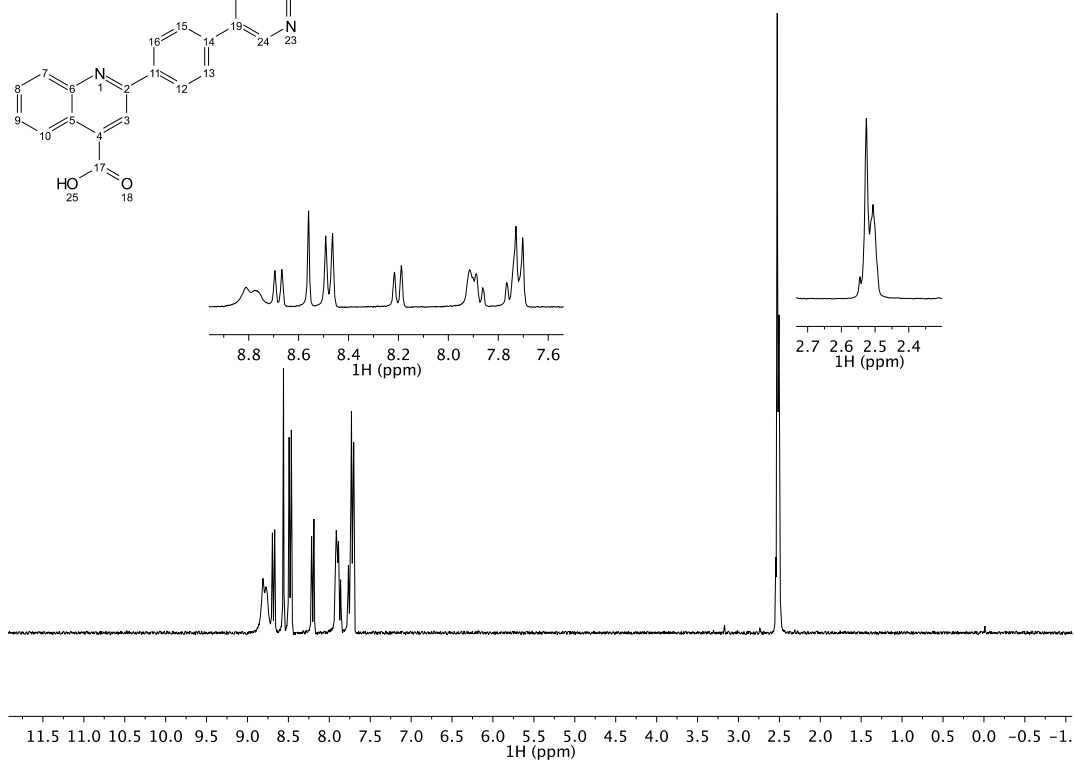

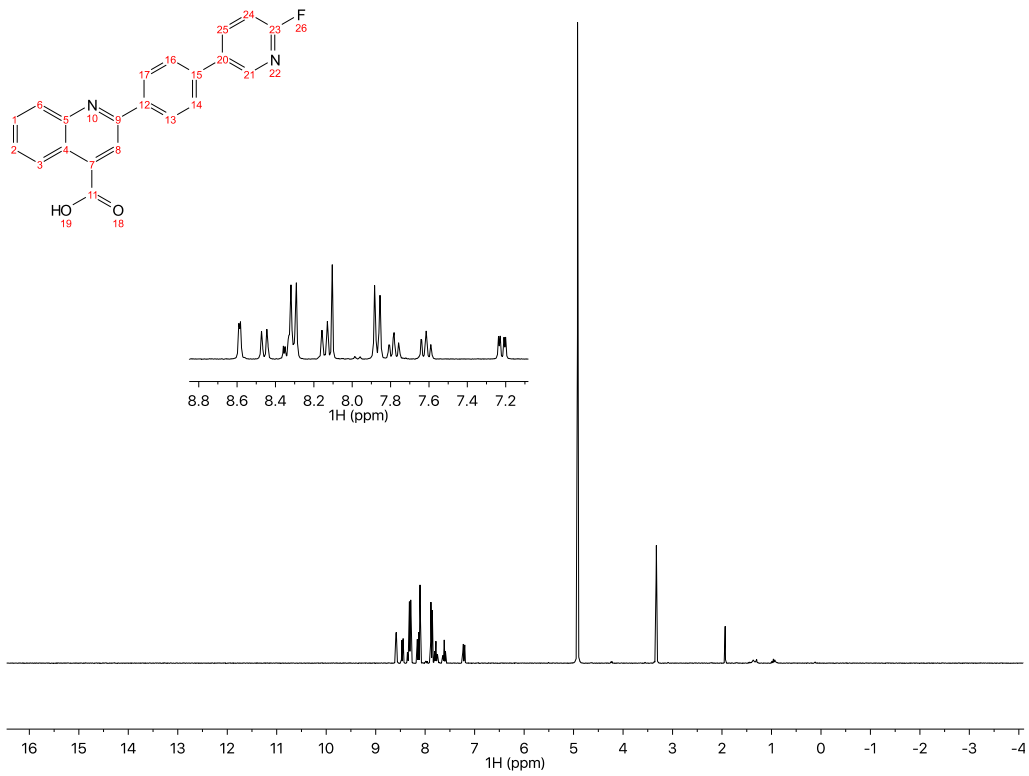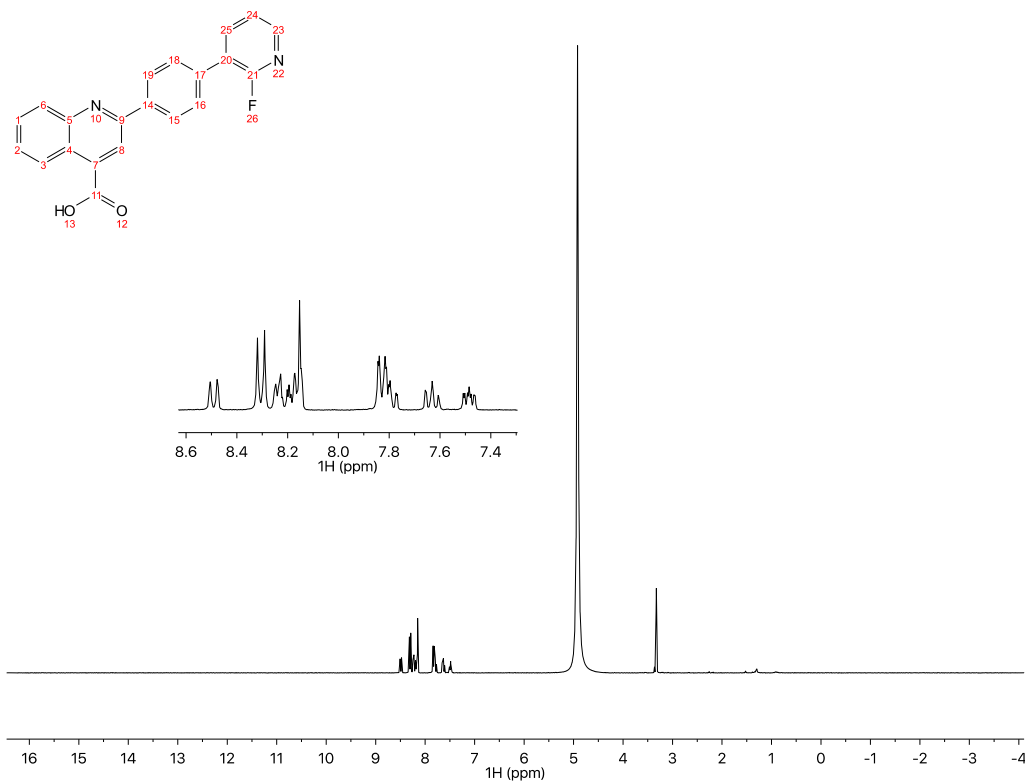

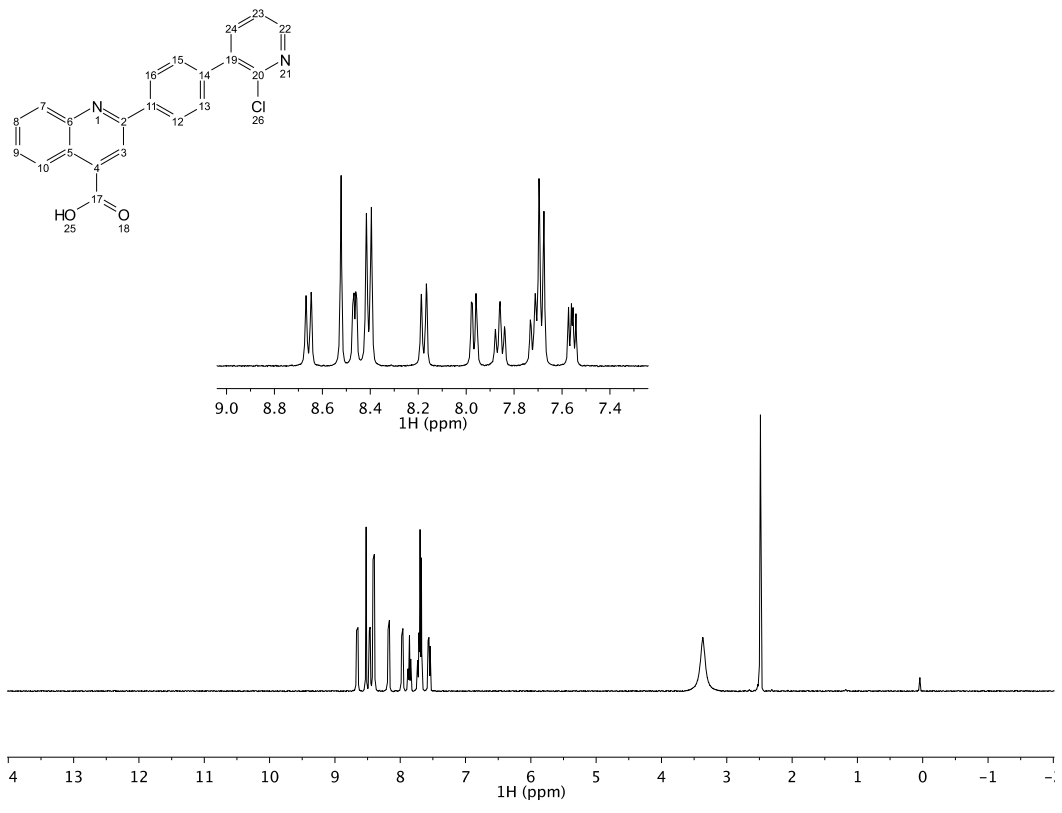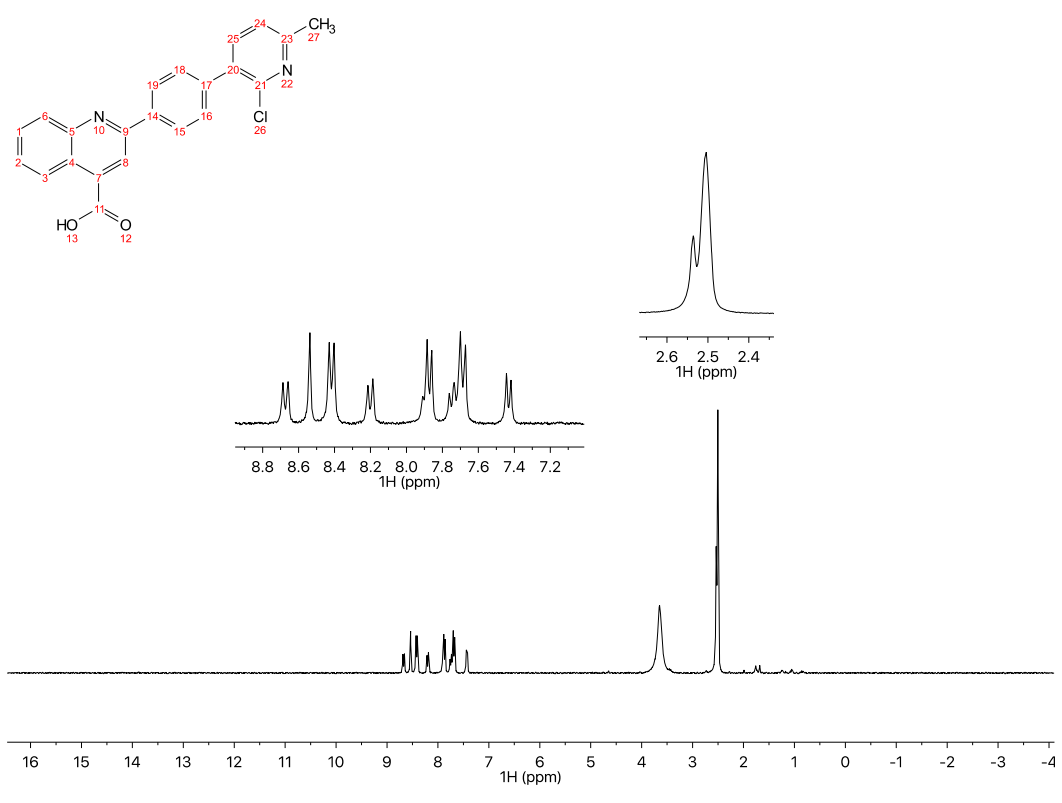

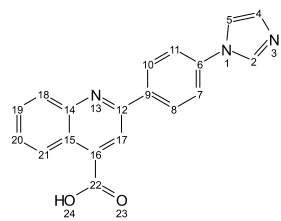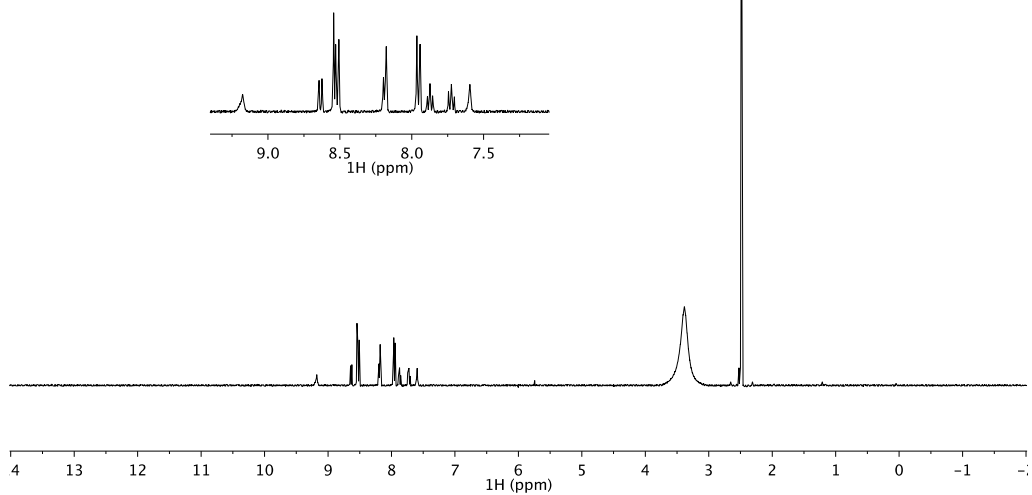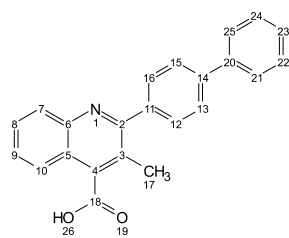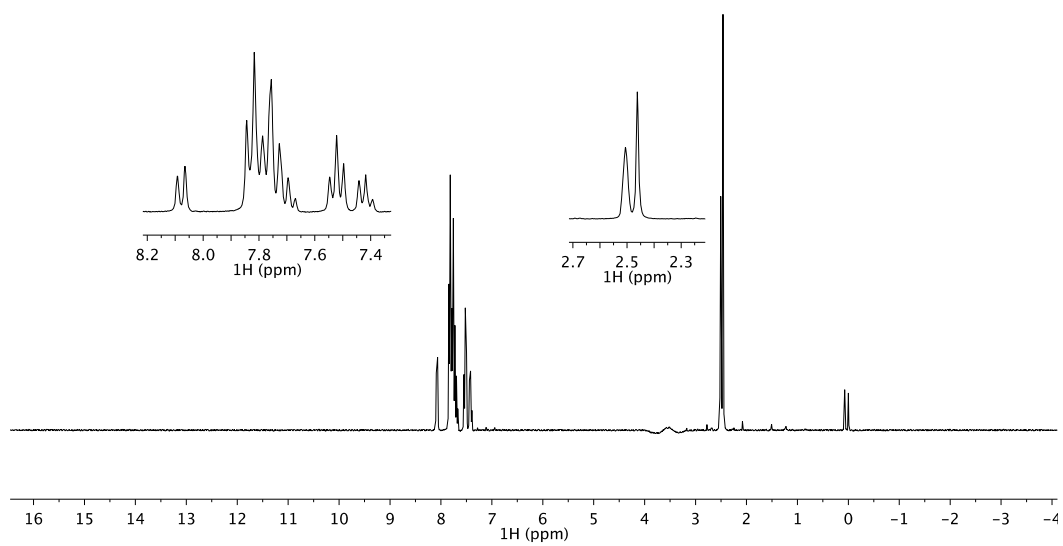

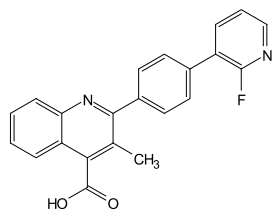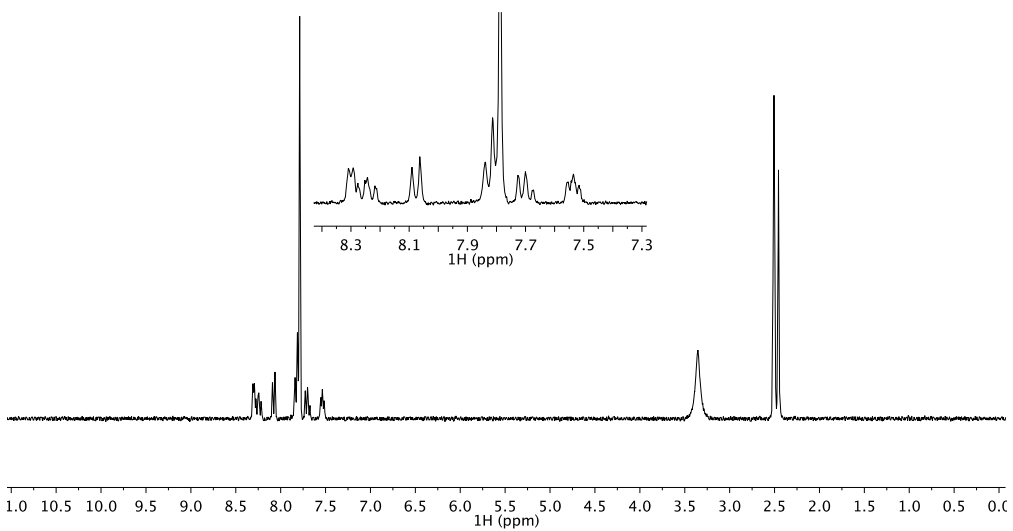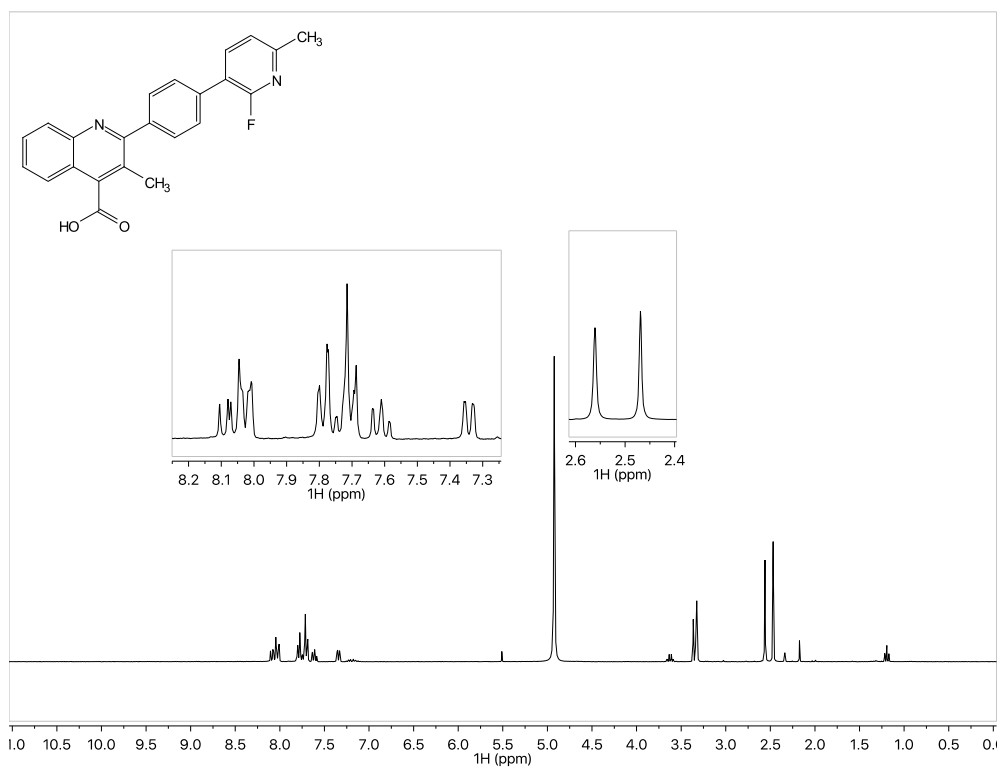

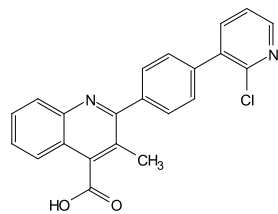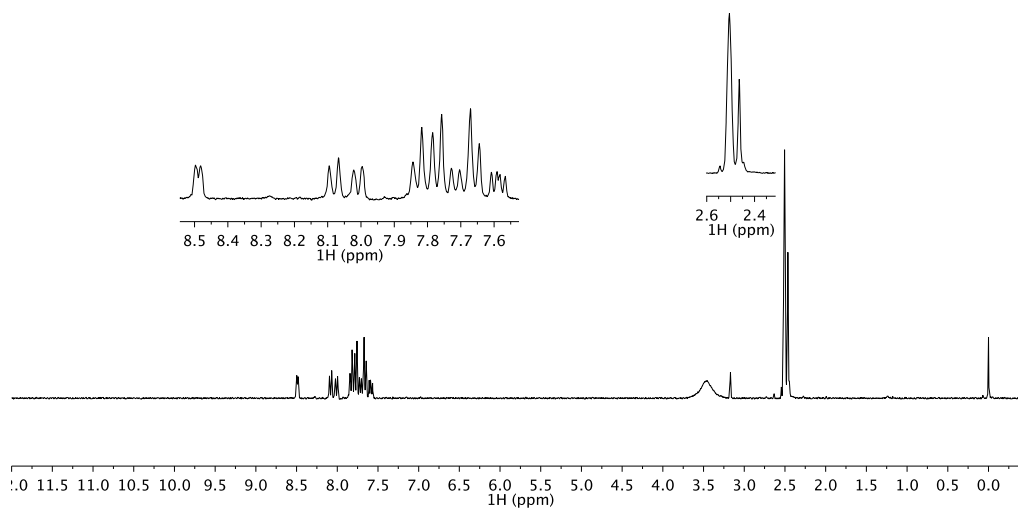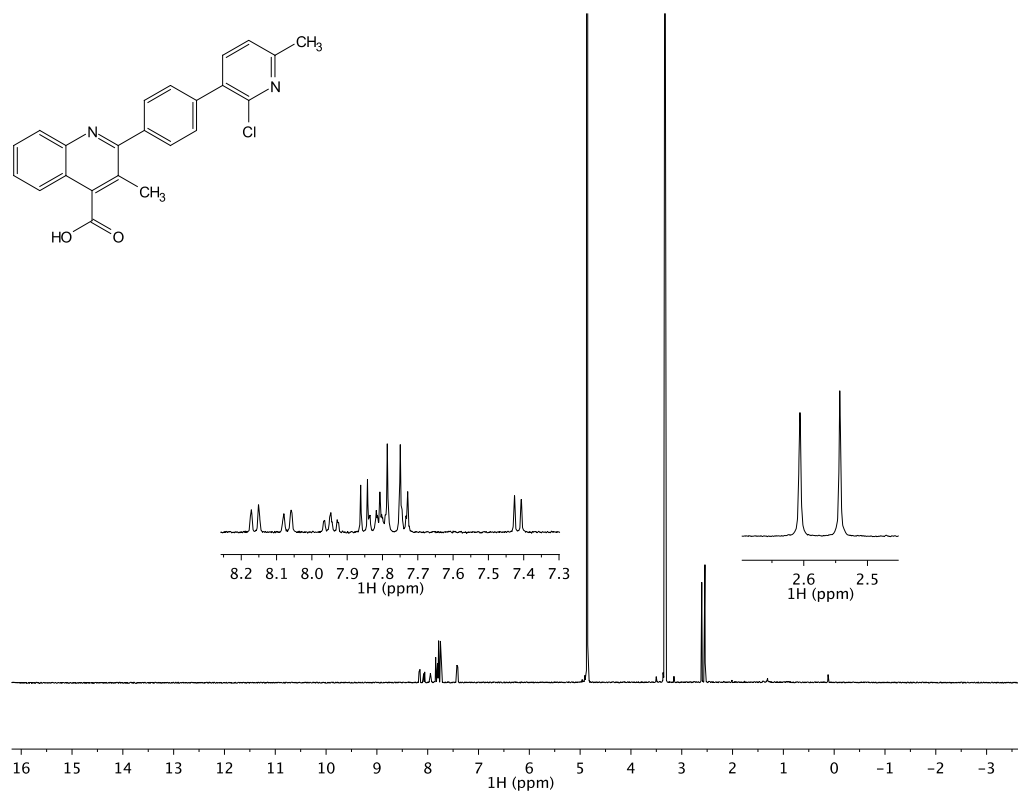



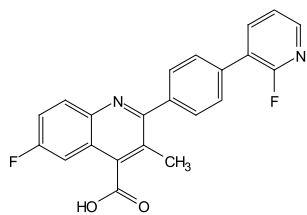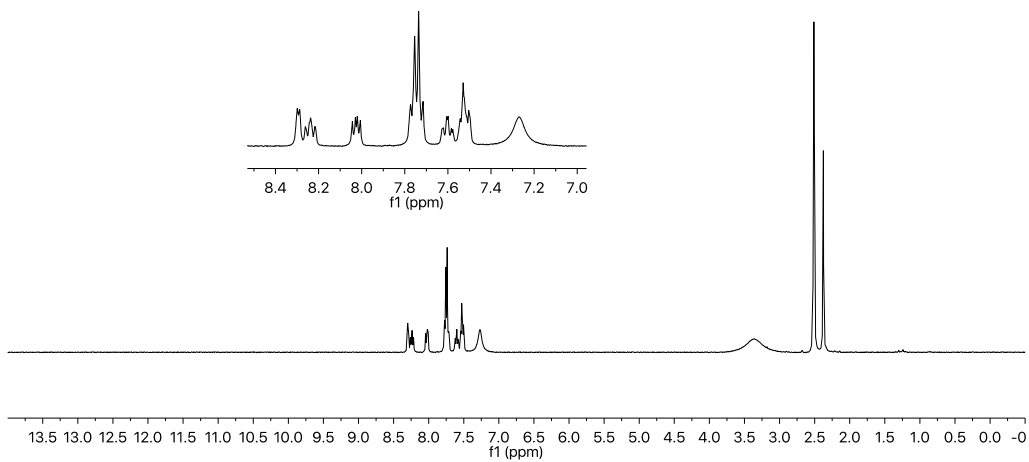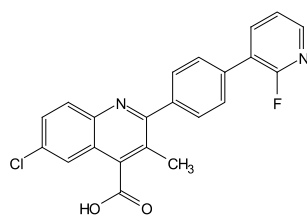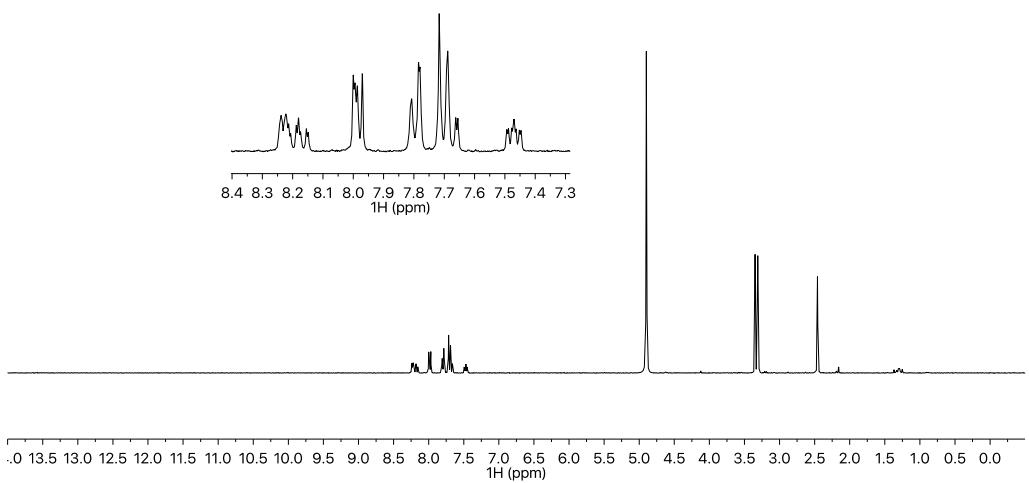

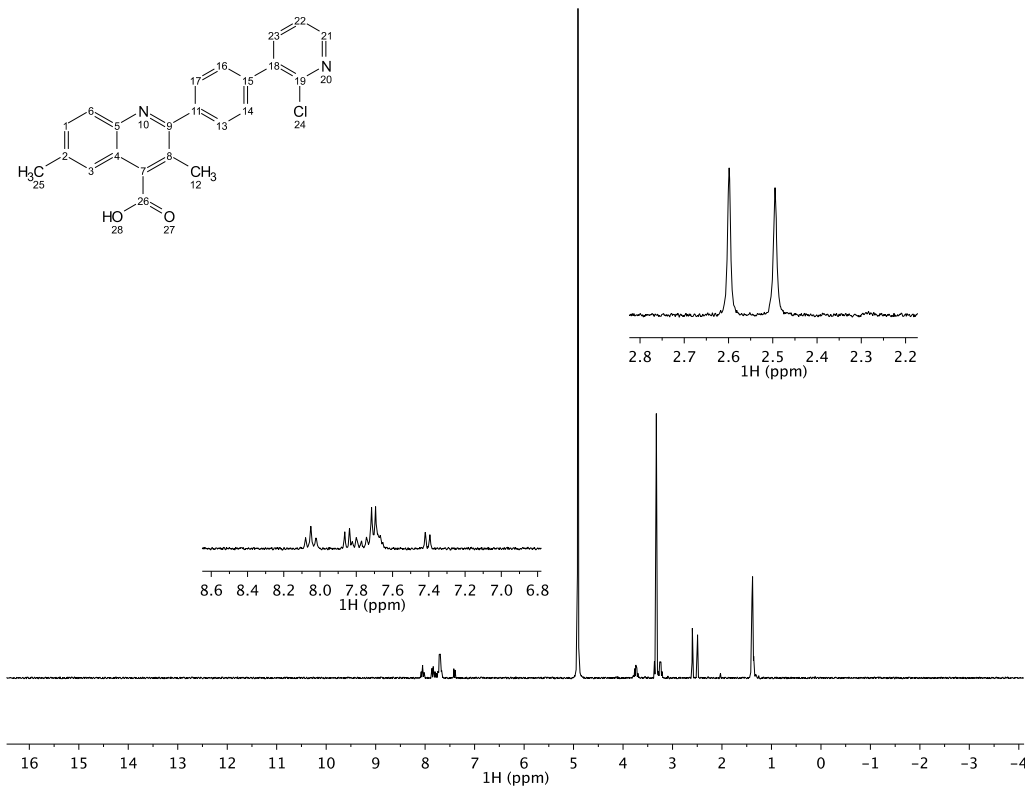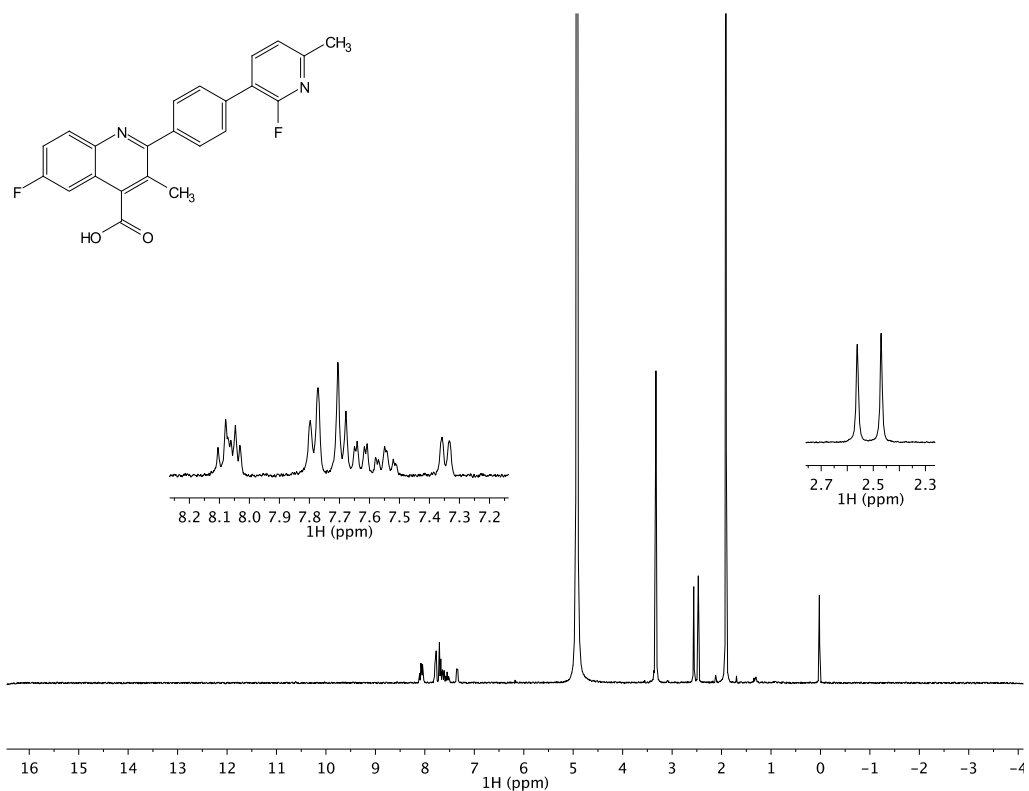

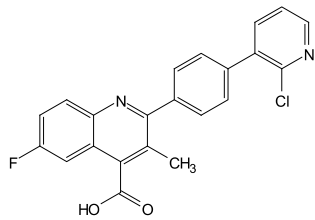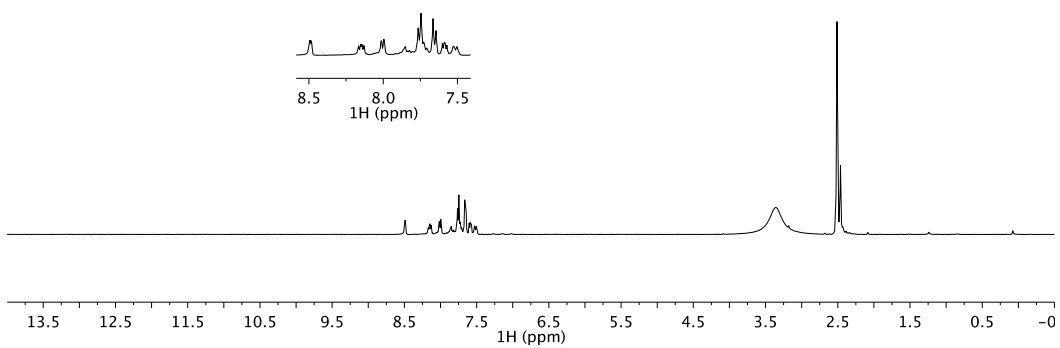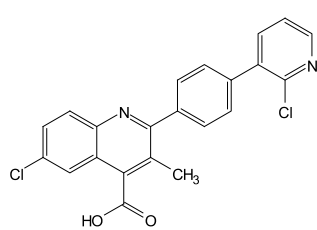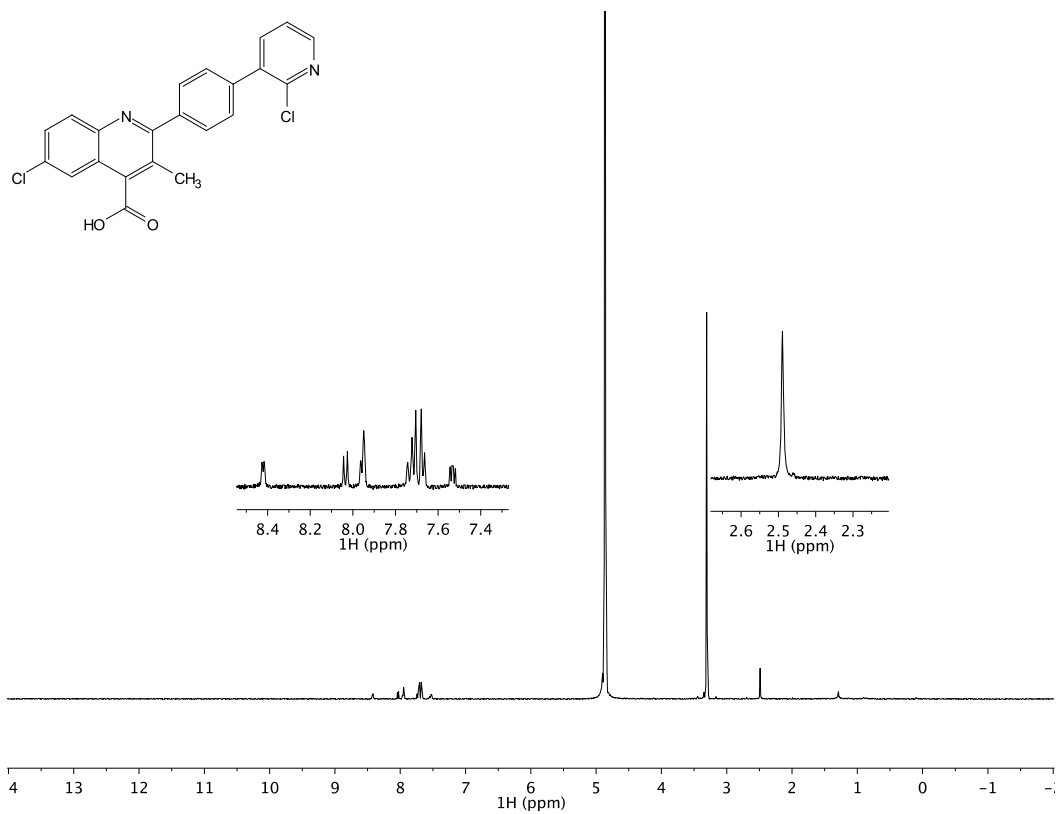

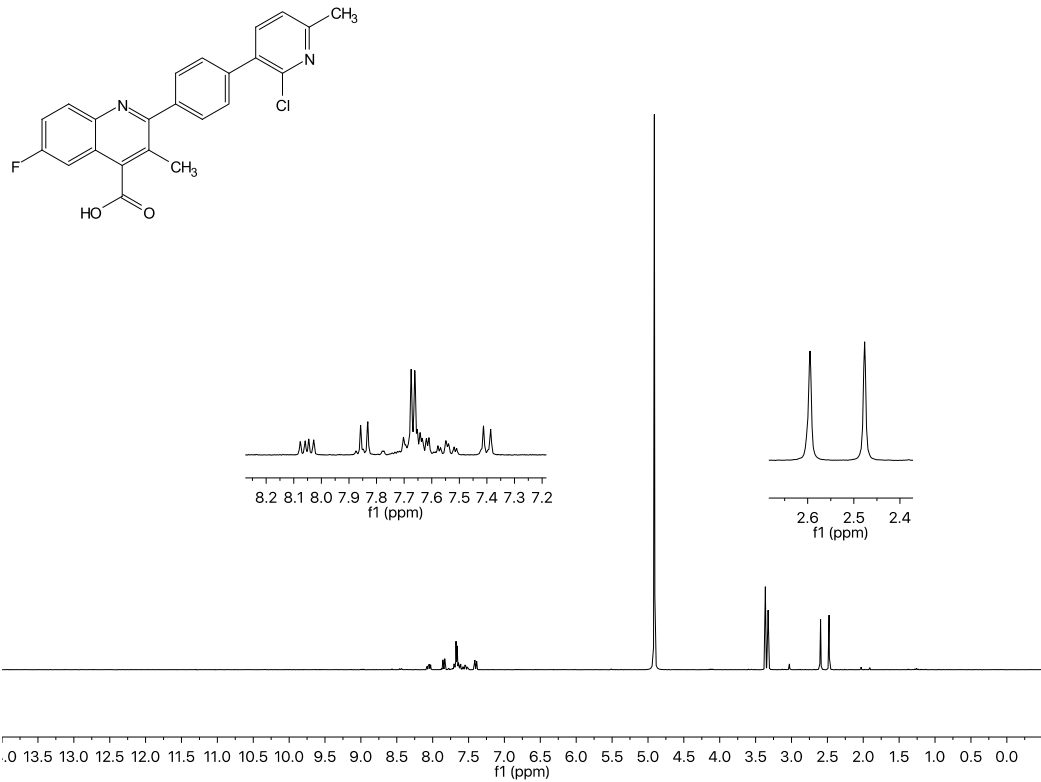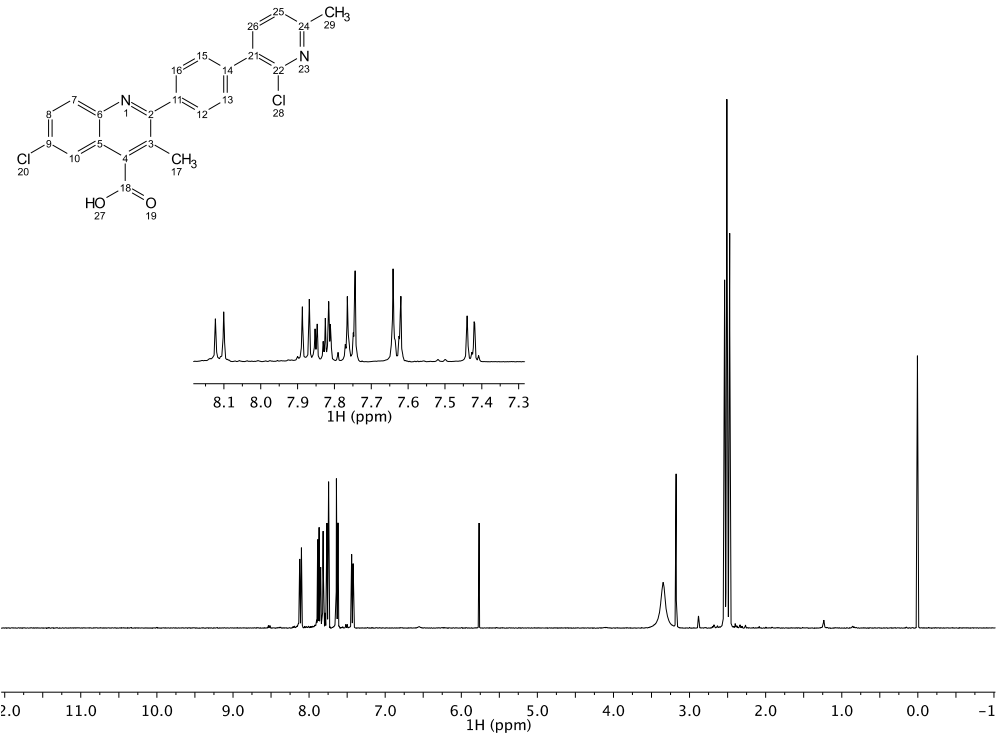

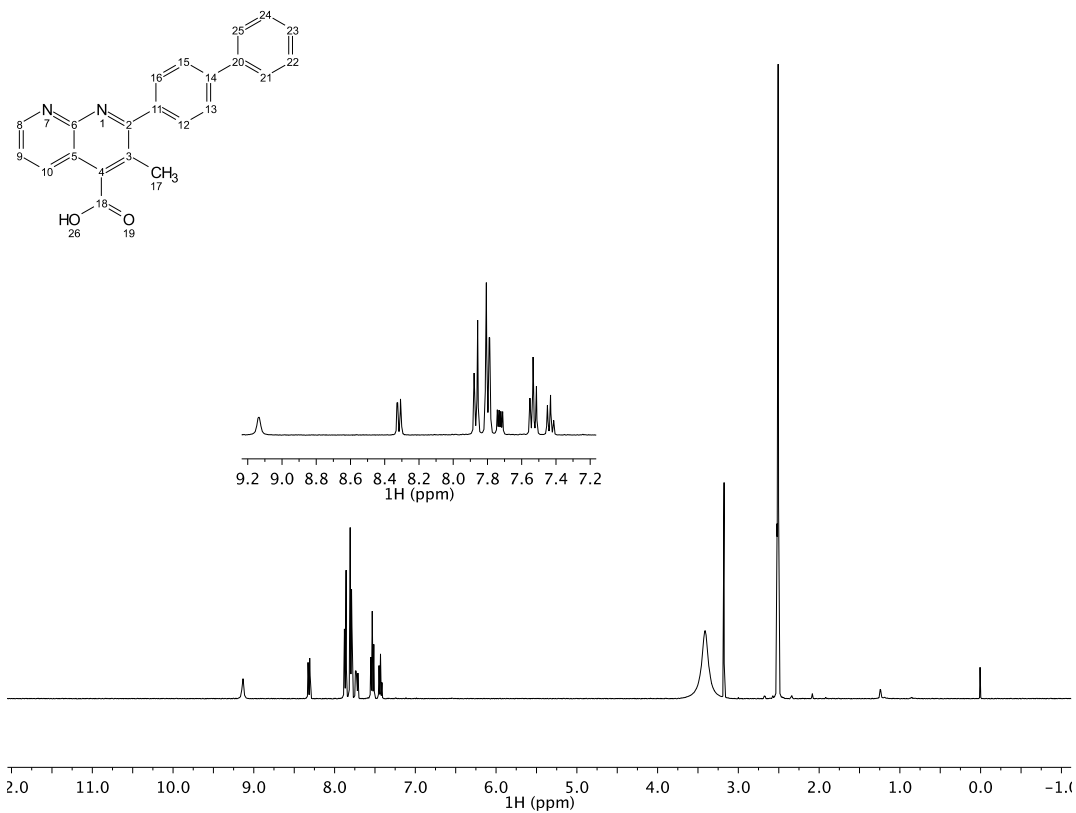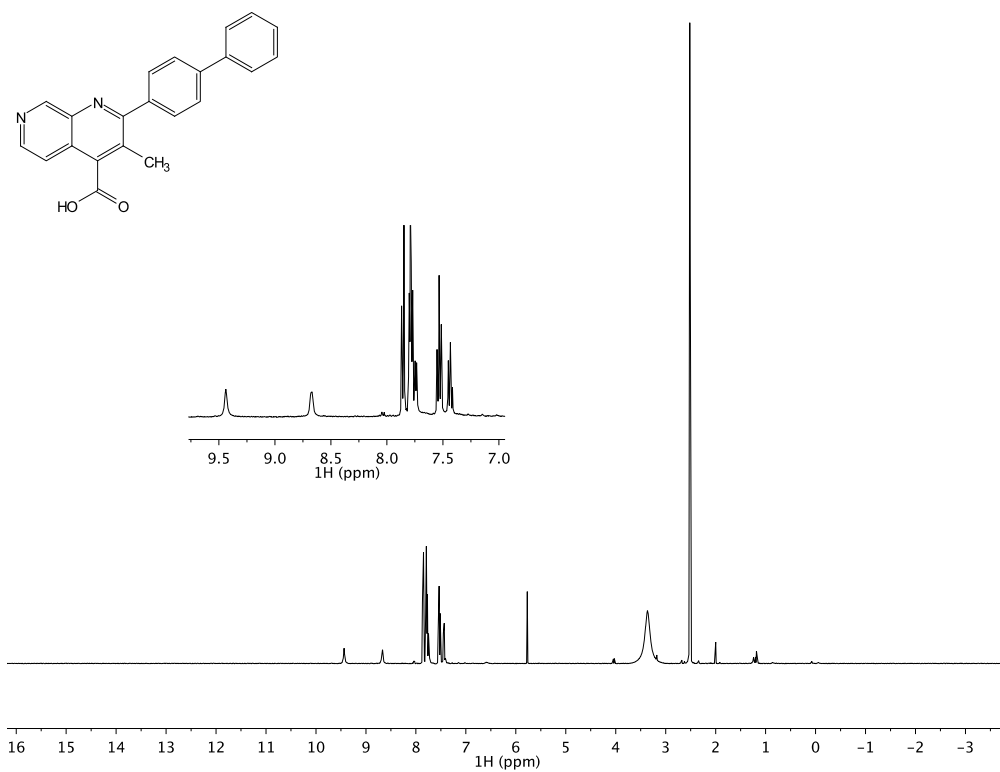

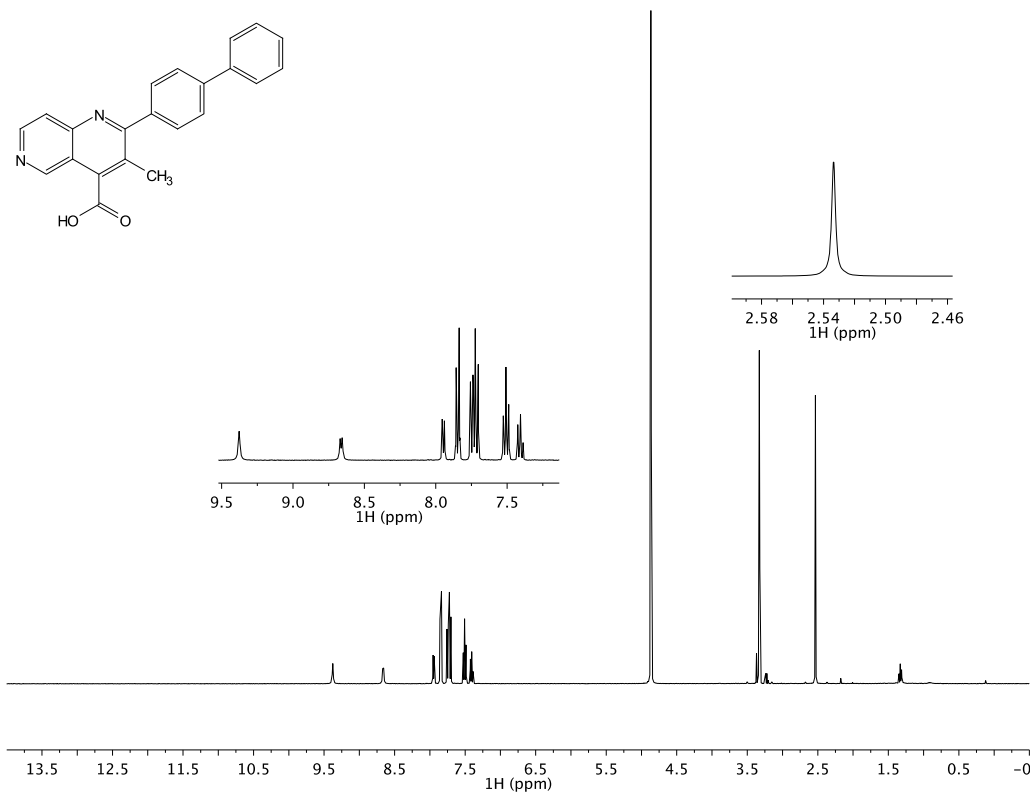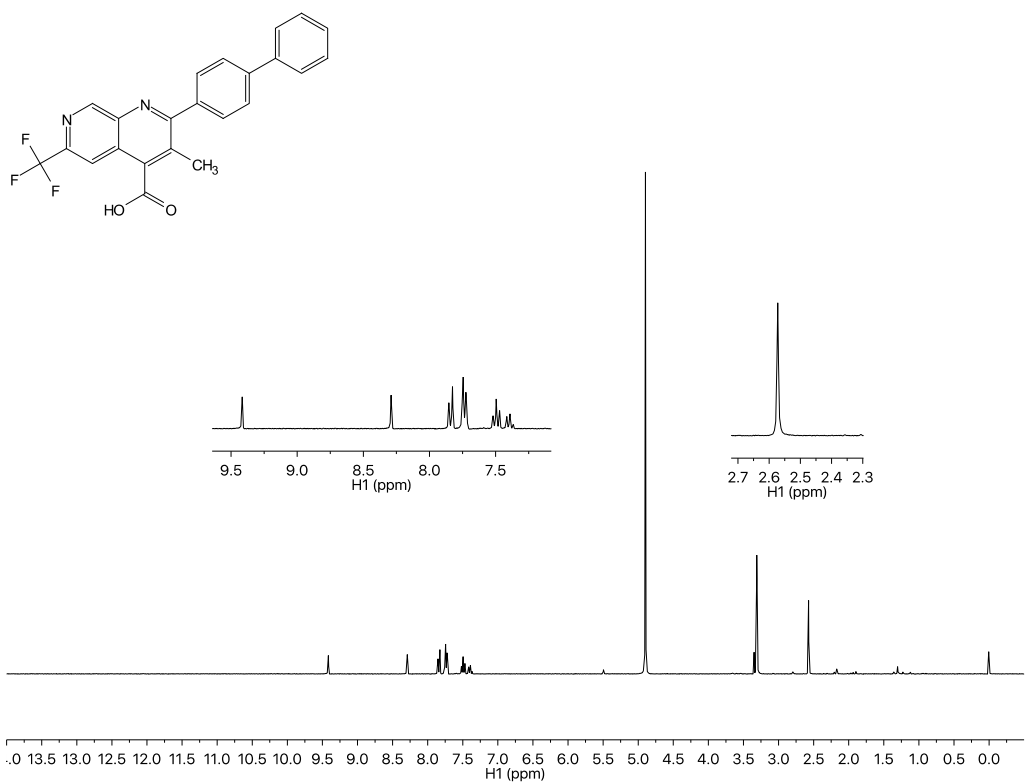

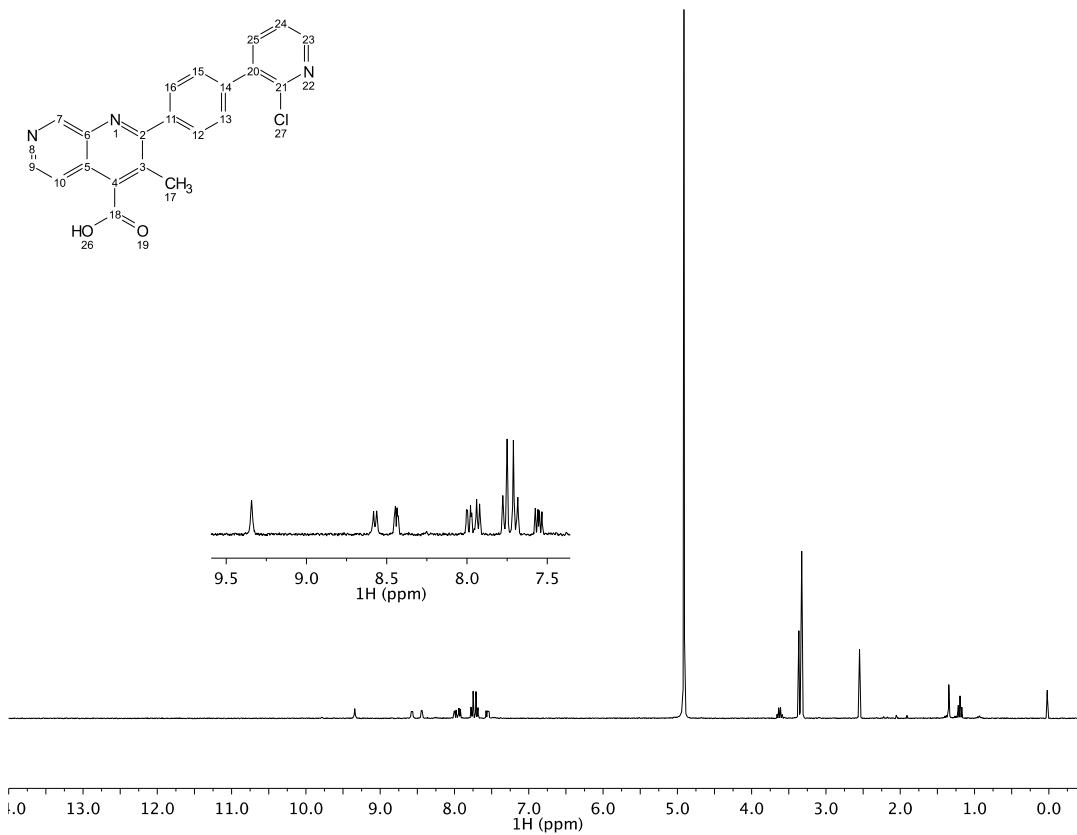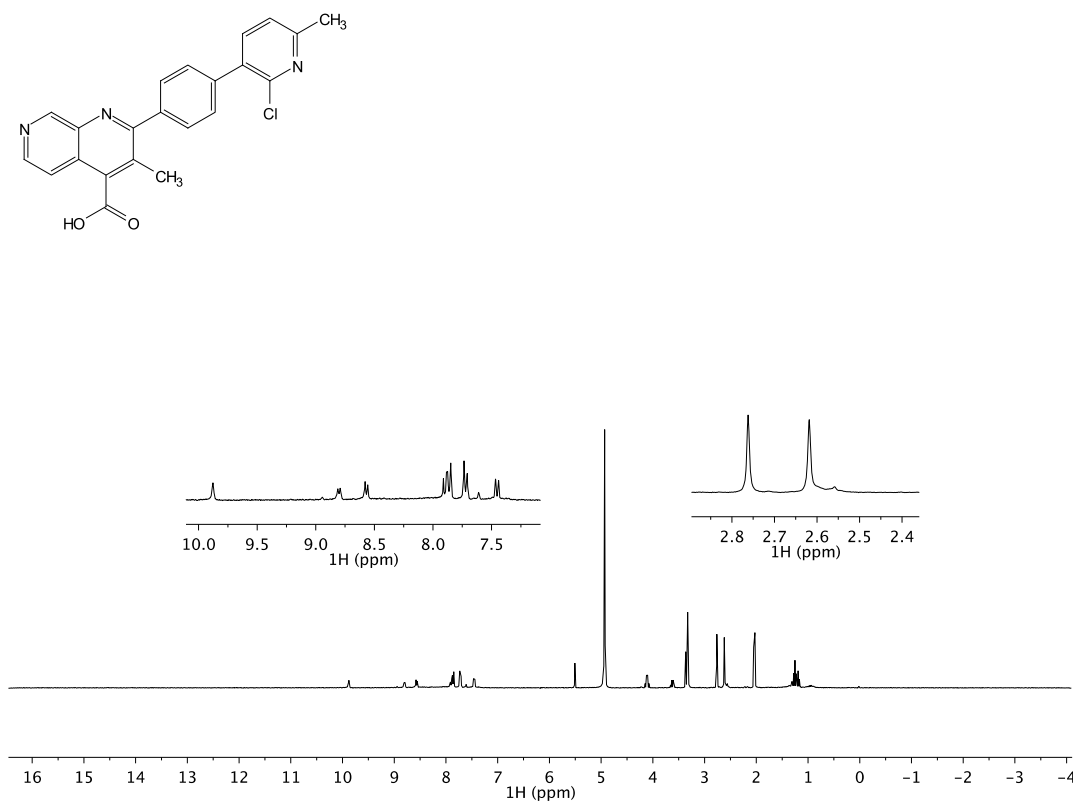

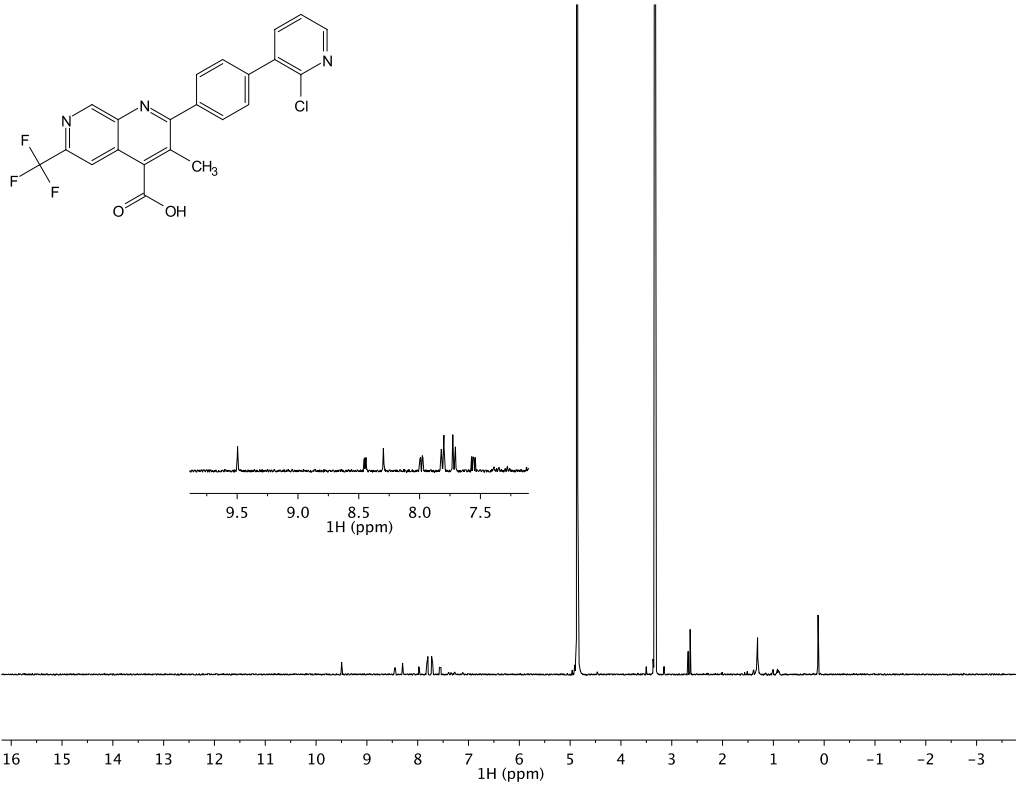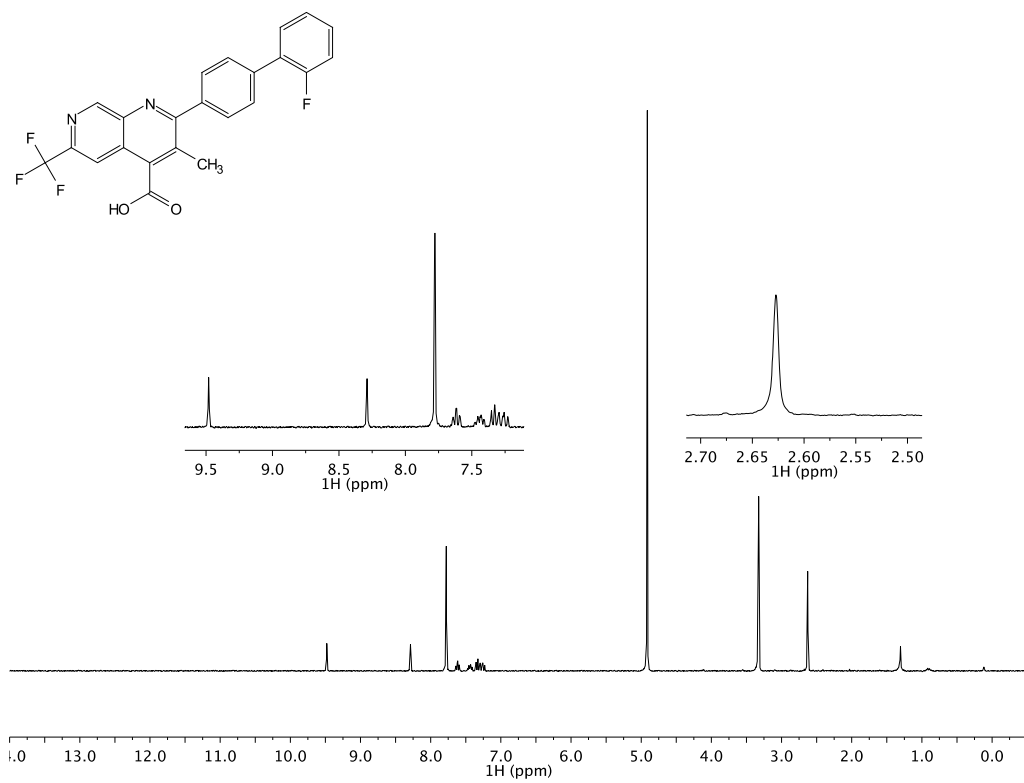

Supplement: NIHMS1775450-supplement-supp_material_a.pdf [file NIHMS1775450-supplement-supp_material_a.pdf]
